1  
2  
3  
4  
5  
6  
7  
8  
9  
10  
11  
12  
13  
14  
15  
16  
17  
18  
19  
20  
21

**Integrative and distinctive coding of perceptual and conceptual object features in the ventral visual stream**

**Authors:**

Chris B Martin<sup>1</sup>, Danielle Douglas<sup>2</sup>, Rachel N Newsome<sup>3</sup>, Louisa LY Man<sup>4</sup>, Morgan D Barensen<sup>1,3</sup>

**Affiliations:**

1. Department of Psychology, University of Toronto, Toronto, ON, Canada
2. Department of Psychology, Mount Allison University, Sackville, NB, Canada
3. Rotman Research Institute, Baycrest, Toronto, ON, Canada
4. Department of Psychology, Queen's University, Kingston, ON, Canada

**Correspondence:**

Chris B. Martin ([cmarti97@gmail.com](mailto:cmarti97@gmail.com)) or Morgan Barensen ([barensen@psych.utoronto.ca](mailto:barensen@psych.utoronto.ca)), Department of Psychology, University of Toronto, 100 St. George Street, Toronto, Ontario, Canada, M5S 3G3

22 **Abstract**

23 A tremendous body of research in cognitive neuroscience is aimed at understanding how object  
24 concepts are represented in the human brain. However, it remains unknown whether and where  
25 the visual and abstract conceptual features that define an object concept are integrated. We  
26 addressed this issue by comparing the neural pattern similarities among object-evoked fMRI  
27 responses with behavior-based models that independently captured the visual and conceptual  
28 similarities among these stimuli. Our results revealed evidence for distinctive coding of visual  
29 features in lateral occipital cortex, and conceptual features in the temporal pole and  
30 parahippocampal cortex. By contrast, we found evidence for integrative coding of visual and  
31 conceptual object features in perirhinal cortex. The neuroanatomical specificity of this effect was  
32 highlighted by results from a searchlight analysis. Taken together, our findings suggest that  
33 perirhinal cortex uniquely supports the representation of fully-specified object concepts through  
34 the integration of their visual and conceptual features.

35

## 36 **Introduction**

37 Semantic memory imbues the world with meaning and shapes our understanding of the  
38 relationships among object concepts. Many neurocognitive models of semantic memory  
39 incorporate the notion that object concepts are represented in a feature-based manner (Rosch and  
40 Mervis, 1975; Tyler and Moss, 2001; Rogers and McLelland, 2004). On this view, our  
41 understanding of the concept “hairdryer” is thought to reflect knowledge of observable  
42 perceptual properties (e.g., visual form) and abstract conceptual features (e.g., “*used to style*  
43 *hair*”). Importantly, however, there is not always a one-to-one correspondence between how  
44 something looks and what it is; a hairdryer and a comb are conceptually similar despite being  
45 visually distinct, whereas a hairdryer and a gun are conceptually distinct despite being visually  
46 similar. Thus, a fully-specified representation of an object concept requires integration of its  
47 perceptual and conceptual features.

48 Neuroimaging research suggests that object features are stored in the modality-specific cortical  
49 regions that supported their processing at the time of acquisition (Thompson-Schill, 2003).  
50 However, neurocognitive models of semantic memory differ with respect to how distributed  
51 features relate to representations of unified object concepts. On one view, object concepts are  
52 thought to emerge through interactions among modality-specific cortical areas (Kiefer and  
53 Pulvermüller, 2012; Martin, 2016). Others maintain that they reflect the integration of modality-  
54 specific features in trans-modal convergence zones (Damasio, 1989; Rogers et al., 2004; Binder  
55 and Desai, 2011), such as the anterior temporal lobes (ATL) (Patterson et al., 2007; Tranel, 2009;  
56 Lambon Ralph et al., 2017).

57 The dominant view of the ATL as a semantic hub was initially shaped by neuropsychological  
58 investigations in individuals with semantic dementia (SD) (Patterson et al., 2007). Behaviorally,

59 SD is characterized by the progressive loss of conceptual knowledge across all receptive and  
60 expressive modalities (Warrington, 1975; Hodges et al., 1992). At the level of neuropathology,  
61 SD is associated with extensive atrophy of the ATL, with the earliest and most pronounced  
62 volume loss in the left temporal pole (Mummery et al., 2000; Galton et al., 2001). Most  
63 important from a theoretical perspective, patients with SD tend to confuse conceptually similar  
64 objects that are visually distinct (e.g., hairdryer – comb), but not visually similar objects that are  
65 conceptually distinct (e.g., hairdryer – gun), indicating that the temporal pole expresses  
66 conceptual similarity structure (Graham et al., 1994; see Peelen and Caramazza, 2012; Chadwick  
67 et al., 2016, for related neuroimaging evidence). Taken together, these findings suggest that the  
68 temporal pole supports multi-modal integration of abstract conceptual, but not perceptual,  
69 features. Notably, however, a considerable body of research indicates that the temporal pole may  
70 not be the only ATL structure that supports feature-based integration.

71 The representational-hierarchical model of object coding emphasizes a role for perirhinal cortex  
72 (PRC), located in the medial ATL, in feature integration that is distinct from that of the temporal  
73 pole (Murray and Bussey, 1999). Namely, within this framework PRC is thought to support the  
74 integration of conceptual *and* perceptual features. In line with this view, object representations in  
75 PRC have been described in terms of conceptual feature conjunctions in studies of semantic  
76 memory (Moss et al., 2005; Bruffaerts et al., 2013; Clarke and Tyler, 2014, 2015; Wright et al.,  
77 2015), and visual feature conjunctions in studies of visual processing (Barense et al., 2005, 2007;  
78 2012; Lee et al., 2005; Devlin and Price, 2007; Murray et al., 2007; O’Neil et al., 2009; Graham  
79 et al., 2010). However, it is difficult to synthesize results from these parallel lines of research, in  
80 part, because conceptual and perceptual features tend to vary concomitantly across stimuli (Mur,  
81 2014). For example, demonstrating greater neural pattern similarity in PRC between “horse” and

82 “donkey” than between “horse” and “dolphin” may reflect differences in conceptual or  
83 perceptual relatedness. Moreover, because studies linking PRC to the integration of visual  
84 features have primarily used pictorial stimuli, it remains unclear whether this result will hold in  
85 tasks that require assessment of visual features retrieved from semantic memory. Thus, although  
86 the representational-hierarchical account was initially formalized nearly two decades ago  
87 (Murray and Bussey, 1999), direct evidence of integration across conceptual and perceptual  
88 features remains elusive.

89 In the current study, we used fMRI to characterize the representational structure of object  
90 concepts in the brain. More specifically, we sought to determine whether and where conceptual  
91 features are integrated with perceptual features, with an emphasis on visual semantics. This issue  
92 was probed, for the first time, using representational similarity analysis (RSA) (Kriegeskorte and  
93 Kievit, 2013) and a set of object concepts that were selected to ensure that conceptual similarity  
94 was not confounded with visual similarity. In a first step, we generated behavior-based models  
95 that captured the conceptual and visual similarities among these object concepts. Next, we  
96 scanned participants using task contexts that emphasized processing of either the conceptual or  
97 perceptual features of these objects. We hypothesized that both behavior-based models would  
98 predict the neural pattern similarities between object concepts, regardless of task context, in  
99 brain regions that support the integration of conceptual and perceptual features. Based on the  
100 neurocognitive models reviewed above, we anticipated that this result would be uniquely  
101 obtained in PRC (Murray and Bussey, 1999; Barense et al., 2011). In addition to PRC, our  
102 analysis also probed regions of interest (ROIs) that have been implicated in semantic processing  
103 (temporal pole and parahippocampal cortex), and visual processing (lateral occipital cortex)

104 (LOC). We also performed a searchlight analysis, which examined activity patterns within small  
105 spheres over the whole brain.

106

## 107 **Results**

### 108 **Behavior-Based Similarity Models**

109 Using a data-driven approach, we first generated behavior-based models that captured the visual  
110 and conceptual similarities among 40 targeted object concepts (Figure 1A-B). Notably, our  
111 visual similarity model and conceptual similarity model were derived from behavioral judgments  
112 provided by two independent groups of participants. For the purpose of constructing the visual  
113 similarity model, the first group of participants (N = 1185) provided pairwise comparative  
114 similarity judgments between object concepts (Figure 1A). Specifically, a pair of words was  
115 presented on each trial and participants were asked to rate the visual similarity between the  
116 object concepts to which they referred using a 5-point Likert scale. Similarity ratings for each  
117 pair of object concepts were averaged across participants, normalized, and expressed within a  
118 representational dissimilarity matrix (RDM). We refer to this RDM as the *behavior-based visual*  
119 *RDM*.

120 For the purpose of constructing the conceptual similarity model, a second group of participants  
121 (N = 1600) completed an online feature-generation task (McRae et al., 2005; Taylor et al., 2012)  
122 (Figure 1B). Each participant was asked to generate a list of conceptual features that characterize  
123 one object concept (e.g., hairdryer: “used to style hair”, “found in salons”, “electrically  
124 powered”, “blows hot air”; comb: “used to style hair”, “found in salons”, “has teeth”, “made  
125 of plastic”). Conceptual similarity between all pairs of object concepts was quantified as the  
126 cosine angle between the corresponding pairs of feature vectors. With this approach, high cosine

127 similarity between object concepts reflects high conceptual similarity. Cosine similarity values  
128 were then expressed within an RDM, which we refer to as the *behavior-based conceptual RDM*.  
129 We next performed a second-level RSA to quantify the relationship between our behavior-based  
130 visual RDM and behavior-based conceptual RDM. Critically, this analysis revealed that the  
131 model RDMs were not significantly correlated with one another (Kendall's tau-a = .01,  $p = .09$ ),  
132 indicating that differences in visual and conceptual features were not confounded across object  
133 concepts. In other words, ensuring that these different types of features varied independently  
134 across stimuli (e.g., hairdryer – gun; hairdryer – comb), rather than concomitantly (e.g., horse –  
135 donkey; horse – dolphin), allowed us to isolate the separate influence of visual and conceptual  
136 features on the representational structure of object concepts in the brain. In this example, a  
137 hairdryer and a gun are visually similar but conceptually dissimilar, whereas a hairdryer and a  
138 comb are visually dissimilar but conceptually similar.

139

#### 140 **fMRI Task and Behavioral Results**

141 We next used fMRI to obtain measurements from which we could infer the representational  
142 structure of our 40 object concepts in the neural activity patterns of a third independent group of  
143 participants (Figure 2). Functional brain data were acquired over eight experimental runs, each of  
144 which consisted of two blocks of stimulus presentation. All 40 object concepts were presented  
145 sequentially within each block, for a total of 16 repetitions per concept. On each trial,  
146 participants were asked to make a “yes / no” property verification judgment in relation to a  
147 block-specific verification probe. Half of the blocks were associated with verification probes that  
148 encouraged processing of visual features (e.g., “is the object angular?”), and the other half were  
149 associated with verification probes that encouraged processing of conceptual features (e.g., “is

150 the object a tool?”). With this experimental design, we were able to characterize neural responses  
151 to object concepts across two task contexts: a visual task context (Figure 2A) and a conceptual  
152 task context (Figure 2B).

153 Behavioral performance on the scanned property verification task indicated that participants  
154 interpreted the object concepts and property verification probes with a high degree of  
155 consistency (Figure 3). Specifically, all participants (i.e., 16/16) provided the same yes/no  
156 response to the property verification task on 88.4% of all trials. Agreement was highest for the  
157 “living” verification probe (96.8%) and lowest for the “non-tool” verification probe (73.2%).  
158 Moreover, the proportion of trials on which all participants provided the same response did not  
159 differ between the visual feature verification task context (Mean = 87.3% collapsed across all  
160 eight visual probes) and the conceptual feature verification task context (Mean = 89.5%  
161 collapsed across all eight conceptual probes) ( $z = 0.19, p = .85$ ). Response latencies were also  
162 comparable across the visual feature verification task context (Mean = 1361ms, SD = 302) and  
163 the conceptual feature verification task context (Mean = 1388ms, SD = 317) ( $t(15) = 0.61, p =$   
164  $.55$ ).

### 165 **ROI-Based RSA: Comparison of Behavior-Based RDMs with Brain-Based RDMs**

167 We next quantified pairwise similarities between multi-voxel activity patterns evoked by specific  
168 object concepts in the fMRI experiment (Figure 2). For the purpose of conducting ROI-based  
169 RSA, we focused on multi-voxel activity patterns obtained in PRC, the temporal pole,  
170 parahippocampal cortex, and LOC. ROIs from a representative participant are presented in  
171 Figure 4. These ROIs were selected a priori based on empirical evidence linking their respective  
172 functional characteristics to visual processing, conceptual processing, or both. Our primary focus  
173 was on PRC, which has been linked to integrative coding of visual object features and conceptual



174 object features across parallel lines of research (Barens et al., 2005, 2007, 2012; Lee et al.,  
175 2005; O’Neil et al., 2009; Bruffaerts et al., 2013; Clarke and Tyler, 2014; 2015; Wright et al.,  
176 2015; Erez et al., 2016). In contrast to PRC, the temporal pole has primarily been linked to  
177 processing of conceptual object properties (Mummery et al., 2000; Galton et al., 2001; Patterson  
178 et al., 2007; Pobric et al., 2007; Lambon Ralph et al., 2009; Peelen and Caramazza, 2012;  
179 Chadwick et al., 2016). A number of studies have also revealed a role for parahippocampal  
180 cortex in semantic contextual processing, though its functional contributions remain less well  
181 defined than the temporal pole (Bar and Aminoff, 2003, Aminoff et al., 2013, Ranganath and  
182 Ritchey, 2012). Lastly, LOC, which is a functionally defined region in occipito-temporal cortex,  
183 has been revealed to play a critical role in processing visual form (Grill-Spector et al., 1999;  
184 Kourtzi and Kanwisher, 2001; Milner and Goodale, 2006). Because we did not have any a priori  
185 predictions regarding hemispheric differences, estimates of neural pattern similarities between  
186 object concepts were derived from multi-voxel activity collapsed across the ROIs in the left and  
187 right hemisphere.

188 Mean object-specific multi-voxel activity patterns were estimated in each ROI using general  
189 linear models fit to data from the visual and conceptual task contexts, separately. Linear  
190 correlation distances (Pearson’s  $r$ ) were calculated between all pairs of object concepts, which  
191 were then expressed in two brain-based RDMs for each ROI. Specifically, the *brain-based visual*  
192 *task RDM* captured the neural pattern similarities obtained between all object concepts in the  
193 visual task context (i.e., while participants made visual feature verification judgments) (Figure  
194 2A), and the *brain-based conceptual task RDM* captured the neural pattern similarities obtained  
195 between all object concepts in the conceptual task context (i.e., while participants made  
196 conceptual feature verification judgments) (Figure 2B).

197 We implemented second-level RSA to compare our behavior-based visual and conceptual RDMs  
198 (i.e., independent dissimilarity models) with the brain-based visual and conceptual task RDMs  
199 (i.e., neural pattern dissimilarity obtained in different verification task contexts) (solid arrows in  
200 Figure 5). These analyses were conducted in each ROI using a ranked correlation coefficient  
201 (Kendall's tau-a) as a similarity index (Nili et al., 2014). Significance testing was performed  
202 using non-parametric permutation tests for all pertinent comparisons. A Bonferroni correction  
203 was applied to compensate for multiple comparisons (4 ROIs x 2 behavior-based RDMs x 2  
204 brain-based RDMs = 16 comparisons, yielding a critical alpha of .003). With this approach, we  
205 revealed that object concepts are represented by three distinctive similarity codes that differed  
206 across ROIs: visual similarity coding, conceptual similarity coding, and integrative coding.  
207 Results from our ROI-based RSA analyses are shown in Figure 6 and discussed in turn below.

#### 208 *Lateral Occipital Cortex Represents Object Concepts with a Visual Similarity Code*

209 Consistent with its well-established role in the processing of visual form, patterns of activity  
210 within LOC reflected the visual similarity of the object concepts (Figure 6). Specifically, we  
211 obtained a significant correlation between the behavior-based visual RDM and the brain-based  
212 visual task RDM in LOC (Kendall's tau-a = .05,  $p < .0001$ ). Notably, however, the correlation  
213 between the behavior-based visual RDM and the brain-based conceptual task RDM was not  
214 significant (Kendall's tau-a = .01,  $p = .20$ ). In other words, activity patterns in LOC expressed a  
215 visual similarity structure when participants were asked to make explicit judgments about the  
216 visual features that characterized object concepts (e.g., whether an object is angular in form), but  
217 not when those judgments pertained to features that were conceptual in nature (e.g., whether an  
218 object is naturally occurring). Conversely, the behavior-based conceptual RDM did not  
219 significantly correlate with the brain-based visual task RDM (Kendall's tau-a = .002,  $p = .45$ ) or

220 brain-based conceptual task RDM (Kendall's tau-a = -.016,  $p = .87$ ), indicating that conceptual  
221 similarities between object concepts did not capture neural pattern similarities in LOC in either  
222 task context. Considered together, these results suggest that LOC represents perceptual  
223 information about object concepts in a task-dependent visual similarity code that generalizes  
224 across visually similar object concepts that are conceptually distinct (e.g., hairdryer – gun), but  
225 not across conceptually similar object concepts that are visually distinct (e.g., hairdryer – comb).

226 *The Temporal Pole and Parahippocampal Cortex Represent Object Concepts with a Conceptual*  
227 *Similarity Code*

228 In line with theoretical frameworks that have characterized the temporal pole as a semantic hub  
229 (Patterson et al., 2007; Tranel et al., 2009), patterns of activity within this specific ATL structure  
230 reflected the conceptual similarity of the object concepts (Figure 6). Specifically, in the temporal  
231 pole we revealed a significant correlation between the behavior-based conceptual RDM and the  
232 brain-based conceptual task RDM (Kendall's tau-a = .06,  $p < .0001$ ). The behavior-based  
233 conceptual RDM was also significantly correlated with the brain-based visual task RDM  
234 (Kendall's tau-a = .04,  $p < .0001$ ). Thus, the temporal pole expressed a conceptual similarity  
235 structure regardless of whether participants were asked to make targeted assessments of  
236 conceptual features (e.g., whether the object is a tool) or visual features (e.g., whether it is  
237 symmetrical). The behavior-based visual RDM was not significantly correlated with either the  
238 brain-based conceptual task RDM (Kendall's tau-a = .01,  $p = .19$ ) or the brain-based visual task  
239 RDM (Kendall's tau-a = -.001,  $p = .55$ ), suggesting that the representational structure of object  
240 concepts in the temporal pole is not shaped by visual properties.

241 Patterns of activity obtained in parahippocampal cortex, which has previously been associated  
242 with the processing of semantically-based contextual associations (Bar and Aminoff, 2003), also

243 reflected the conceptual similarity of the object concepts (Figure 6). Unlike the temporal pole,  
244 however, parahippocampal cortex expressed conceptual similarity structure in a task-specific  
245 manner. Specifically, the behavior-based conceptual RDM was significantly correlated with the  
246 brain-based conceptual task RDM (Kendall's tau-a = .06,  $p < .0001$ ), but not the brain-based  
247 visual task RDM (Kendall's tau-a = .02,  $p = .10$ ). The behavior-based visual RDM was not a  
248 significant predictor of neural dissimilarity structure captured by either the brain-based visual  
249 task RDM (Kendall's tau-a = .002,  $p = .42$ ) or the brain-based conceptual task RDM (Kendall's  
250 tau-a = .009,  $p = .22$ ).

251 In sum, these results suggest that the temporal pole and parahippocampal cortex represent  
252 conceptual information in a manner that enables efficient generalization across conceptually  
253 related object concepts that are visually distinct (e.g., hairdryer – comb), but not visually related  
254 object concepts that are conceptually distinct (e.g., hairdryer – gun). That is, the degree of  
255 similarity between object-evoked activity patterns in these structures reflected the degree of  
256 conceptual feature overlap, but not visual feature overlap, between those object concepts.  
257 Notably, the temporal pole expressed this conceptual similarity code even when the information  
258 that it conveyed was orthogonal to task demands. For example, hairdryer and comb were  
259 represented more similarly than were hairdryer and gun, even when task demands encouraged  
260 processing of visual features in the visual task context. Conversely, our results suggest that  
261 parahippocampal cortex expresses conceptual similarity structure only when task demands  
262 prioritize processing of conceptual information in the conceptual feature verification task.

263 *Perirhinal Cortex Represents Object Concepts with a Similarity Code that Reflects Integration of*  
264 *Conceptual and Visual Features*

265 Results obtained in PRC support the notion that this structure integrates conceptual and visual  
266 object features, as first theorized in the representational-hierarchical model of object  
267 representation (Murray and Bussey, 1999). Namely, we revealed that the behavior-based visual  
268 RDM and the behavior-based conceptual RDM were each significantly correlated with both the  
269 brain-based visual task RDM (behavior-based visual RDM Kendall's tau-a = .07,  $p < .0001$ ;  
270 behavior-based conceptual RDM Kendall's tau-a = .05,  $p < .0001$ ), and the brain-based  
271 conceptual task RDM (behavior-based visual RDM Kendall's tau-a = .04,  $p < .001$ ; behavior-  
272 based conceptual RDM Kendall's tau-a = .07,  $p < .0001$ ) (Figure 6). These findings indicate that  
273 PRC simultaneously expressed both conceptual and visual similarity structure, and did so  
274 regardless of whether participants were asked to make targeted assessments of conceptual  
275 features (e.g., whether the object concept is living) or visual features (e.g., whether it is  
276 elongated). In other words, activity patterns in PRC captured the conceptual similarity between  
277 hairdryer and comb, as well as the visual similarity between hairdryer and gun, and did so  
278 irrespective of task context. Critically, these results were obtained despite the fact that the brain-  
279 based RDMs were orthogonal to one another (i.e., not significantly correlated). Considered  
280 together, these results suggest that, of the a priori ROIs considered, PRC represents object  
281 concepts at the highest level of specificity through integration of visual and conceptual features.

282

### 283 **ROI-Based RSA: Comparisons of Brain-Based RDMs with Brain-Based RDMs**

284 We next implemented an additional second-level RSA in which we directly compared object-  
285 evoked neural similarity patterns within and across our four a priori ROIs. These analyses were  
286 conducted using the same methodological procedures applied to compare behavior-based RDMs  
287 with brain-based RDMs. We first sought to quantify the representational similarity between the

288 brain-based visual task RDM and brain-based conceptual task RDM obtained within each ROI.  
289 This comparison is denoted by the dashed horizontal arrow in the bottom of Figure 5. Notably,  
290 these brain-based RDMs were significantly correlated with one another in PRC (Kendall's tau-a  
291 = .06,  $p < .001$ ), but not in the temporal pole (Kendall's tau-a = .01,  $p = .28$ ), parahippocampal  
292 cortex (Kendall's tau-a = -.01,  $p = .69$ ), or LOC (Kendall's tau-a = .02,  $p = .18$ ). This result  
293 suggests that PRC emphasized similar representational distinctions between object concepts  
294 regardless of whether those concepts were processed in the context of a visual or conceptual task  
295 context.

296 In a second set of analyses, we examined whether activity in different ROIs reflected similar  
297 representational distinctions across object concepts within the same task context. To this end, we  
298 first compared the brain-based visual task RDM obtained in a given ROI with those obtained in  
299 all other ROIs. For example, we asked whether the brain-based visual task RDMs obtained in  
300 PRC and LOC were significantly correlated with one another for the visual task context.  
301 Interestingly, these analyses did not reveal any significant results between any of our ROIs (all  
302 Kendall's tau-a  $< .029$ , all  $p > .12$ ). These findings indicate that PRC and LOC, two regions that  
303 expressed a visual similarity code as revealed through comparison with the behavior-based visual  
304 RDM (Figure 3B), emphasized different visually-based representational distinctions between  
305 object concepts.

306 We next compared the brain-based conceptual task RDM obtained in a given ROI with those  
307 obtained in all other ROIs. For example, we asked whether the brain-based conceptual task  
308 RDMs obtained in PRC and the temporal pole, were significantly correlated with one another.  
309 This set of analyses revealed a trend toward a positive correlation between PRC and  
310 parahippocampal cortex (Kendall's tau-a = .05,  $p < .01$ , corrected critical alpha = .003), but no

311 such relationship between any other ROIs (all Kendall's tau-a < .034, all  $p > .08$ ). These findings  
312 suggest that although the brain-based conceptual task RDMs obtained in PRC, parahippocampal  
313 cortex, and the temporal pole were all significantly correlated with the behavior-based  
314 conceptual RDM, they may emphasize different conceptually-based representational distinctions  
315 between object concepts.

316

### 317 **Searchlight-Based RSA: Comparisons of Behavior-Based RDMs with Brain-Based RDMs**

318 *Perirhinal Cortex is the Only Cortical Region that Supports Integrative Coding of Conceptual*  
319 *and Visual Object Features*

320 We next implemented a whole-volume searchlight-based RSA to investigate the neuroanatomical  
321 specificity of our ROI-based results. Specifically, we sought to determine whether object  
322 representations in PRC expressed visual and conceptual similarity structure within overlapping  
323 or distinct populations of voxels. If PRC does indeed support the integrative coding of visual and  
324 conceptual object features, then the same subset of voxels in this structure should express both  
325 types of similarity codes. If PRC does not support the integrative coding of visual and conceptual  
326 object features, then different subsets of voxels should express these different similarity codes.

327 More generally, data-driven searchlight mapping allowed us to explore whether any other  
328 regions of the brain showed evidence for integrative coding of visual and conceptual features in a  
329 manner comparable to that observed in PRC. To this end we performed searchlight RSA using  
330 multi-voxel activity patterns restricted to a 100 voxel ROI that was iteratively swept across the  
331 entire cortical surface (Kriegeskorte et al., 2006; Oosterhof et al., 2011). In each searchlight ROI,  
332 the behavior-based RDMs were compared with the brain-based RDMs using a procedure  
333 identical to that implemented in our ROI-based RSA. These comparisons are depicted by the

334 solid black arrows in Figure 5. The obtained similarity values (Pearson's  $r$ ) were mapped to the  
335 center of each ROI for each participant separately. With this approach, we obtained participant-  
336 specific similarity maps for all comparisons, which were then standardized and subjected to a  
337 group-level statistical analysis. A threshold-free cluster enhancement (TFCE) method was used  
338 to correct for multiple comparisons with a cluster threshold of  $p < 0.05$  (Smith and Nichols,  
339 2009).

340 All searchlight results are depicted in Figure 7, with corresponding cluster statistics, co-  
341 ordinates, and anatomical labels reported in Table 1. Statistically thresholded group-level  
342 similarity maps are presented in Figure 6A for comparison of both behavior-based RDMs with  
343 the brain-based visual task RDM, and in Figure 6C for comparison of both behavior-based  
344 RDMs with the brain-based conceptual task RDM. To determine whether PRC expressed visual  
345 similarity structure and conceptual similarity structure in overlapping or distinct sets of voxels,  
346 we examined the extent of voxel overlap across similarity maps. In a first step, we asked whether  
347 there were any common voxels across the similarity maps obtained within each task context,  
348 separately. Overlapping voxels across similarity maps obtained through comparison of behavior-  
349 based RDMs with the brain-based RDM derived from the visual task context are presented in  
350 Figure 6B. Overlapping voxels across similarity maps obtained through comparison of behavior-  
351 based RDMs with the brain-based RDM derived from the conceptual task context are presented  
352 in Figure 6D. Within each task context, we revealed a contiguous cluster of voxels in left PRC in  
353 which both behavior-based RDMs predicted task-specific brain-based RDMs.

354 In a second step, we examined whether any voxels were common across the task-specific  
355 overlapping clusters. In other words, we asked whether both behavior-based RDMs were able to  
356 describe the both brain-based RDMs derived from a common set of voxels (as depicted by the



357 black arrows in Figure 6E). Critically, left PRC was the only region in the entire scanned volume  
358 in significant clusters of voxels overlapped across all similarity maps (Figure 6E). This result  
359 indicates that a subset of voxels within PRC simultaneously expressed both visual and  
360 conceptual similarity structure, suggesting that this structure does indeed support integration of  
361 the visual and conceptual features that define an object concept.

362

363

## 364 **Discussion**

365 Although decades of research have aimed at understanding how object concepts are represented  
366 in the brain (Warrington et al., 1975; Hodges et al., 1992; Martin et al., 1995; Murray and  
367 Bussey, 1999; Chen et al., 2017), the fundamental question of whether and where their  
368 conceptual and perceptual features are integrated remains unanswered. Progress toward this end  
369 has been hindered by the fact that such features tend to vary concomitantly across object  
370 concepts. Here, we used a data-driven approach to systematically select a set of object concepts  
371 in which visual and conceptual features varied independently (e.g., hairdryer – comb, which are  
372 conceptually but not visually similar; hairdryer – gun, which are visually but not conceptually  
373 similar). By comparing behavior-based models of the visual and conceptual similarity structure  
374 of these object concepts with corresponding brain-based similarity structure we revealed novel  
375 evidence for an integrative coding process that binds conceptual object features with observable  
376 perceptual features in a task-invariant manner. This integrative coding, which we uniquely found  
377 in PRC, may guide complex behavior through the representation of objects and object concepts  
378 at the highest level of specificity. Moreover, we also revealed a representational distinction  
379 between PRC and the temporal pole as they relate to semantic memory. Namely, whereas PRC  
380 showed evidence of integrative coding across conceptual and visual features, neural activity

381 patterns in the temporal pole were best understood in relation to a purely conceptual code. Taken  
382 together, these findings provide a first step toward filling a theoretically important gap in the  
383 cognitive neuroscience of semantic memory and object representation, more broadly.

384 Our central finding is that patterns of activity within PRC reflected both the visual and  
385 conceptual similarities between object concepts. We interpret this result as evidence for  
386 integration for reasons directly related to our experimental design. First, the behavior-based  
387 visual RDM and behavior-based conceptual RDM (i.e., the models) used in the current study  
388 were not correlated with one another, indicating that these models accounted for different  
389 sources of variability in the relationships among the object concepts. For example, the behavior-  
390 based conceptual RDM captured a relationship between “hairdryer” and “comb”, where none  
391 existed in the behavior-based visual RDM. Second, and despite the fact that these behavior-based  
392 RDMs were orthogonal to one another, they could each be used to describe the brain-based  
393 RDMs derived from both the visual and conceptual task contexts. Critically, across our ROI-  
394 based RSA and our searchlight analysis, PRC was the only region in which we obtained this  
395 pattern of results. At the level of interpretation, the importance of these points is perhaps best  
396 illustrated with an example from our experiment. Specifically, our results indicated that while  
397 participants made *conceptual* judgments about objects in the fMRI scanner, such as whether a  
398 “hairdryer” is man-made or a “gun” is pleasant, the corresponding degree of neural pattern  
399 similarity between “hairdryer” and “gun” could be captured by their *perceptual* similarity, as  
400 indexed by behavioral ratings from an independent group of observers. Likewise, when  
401 participants made *perceptual* judgments about object concepts in the fMRI task, such as whether  
402 a “hairdryer” is angular or a “comb” is elongated, the corresponding degree of neural pattern  
403 similarity between “hairdryer” and “comb” could be captured by their *conceptual* similarity, as

404 derived from responses provided by an independent group of participants. In both cases, PRC  
405 carried information about semantic features that were neither required to perform the immediate  
406 task at hand, nor correlated with the features that did in fact have task-relevant diagnostic value.  
407 Moreover, results from our RSA-based searchlight mapping analysis indicated that a contiguous  
408 cluster of voxels in left PRC was the only region in the brain that showed this effect. Thus,  
409 despite the fact that we disentangled conceptual and perceptual feature overlap across objects  
410 and imposed task demands that biased processing toward one class of feature or the other, both  
411 types of information were ubiquitous and inseparable in PRC. When considered together, these  
412 results suggest that, at the level of PRC, it may not be possible to fully disentangle conceptual  
413 and perceptual information.

414 Convergent evidence from studies of functional and structural connectivity in humans, non-  
415 human primates, and rodents indicates that PRC is connected to the temporal pole,  
416 parahippocampal cortex, LOC, and nearly all other unimodal and polymodal sensory regions in  
417 neocortex (Suzuki and Amaral, 1994; Burwell and Amaral, 1998; Kahn et al., 2008; McLelland  
418 et al., 2014; Suzuki and Naya, 2014; Wang et al., 2016; Zhuo et al., 2016). Thus, PRC has the  
419 connectivity properties that make it well suited to be a multi-modal convergence zone that  
420 integrates object features that are both conceptual and perceptual in nature. Indeed, our results  
421 have linked LOC to the representation of visual semantic attributes, the temporal pole and  
422 parahippocampal cortex to the representation of conceptual attributes, and PRC to the  
423 representation of both types of object features. Notably, however, additional research is  
424 necessary to directly characterize the nature and direction of semantic information exchanged  
425 among these regions. Our findings are also of relevance to the proposal that PRC represents  
426 objects in a manner that reflects the highest degree of feature-based integration (i.e., the

427 representational-hierarchical model) (Murray et al., 2007; Graham et al., 2010; Barense et al.,  
428 2010, 2011; see Lehky and Tanaka, 2016, for related discussion). Whereas previous research has  
429 primarily described its functional role at the level of either visual properties (Buckley and  
430 Gaffan, 2006; Murray et al., 2007; Graham et al., 2010; Barense et al., 2012) or semantic  
431 attributes (Noppeny et al., 2007; Bruffaerts et al., 2013; Clarke and Tyler, 2014, 2015), here we  
432 show for the first time that PRC integrates both types of features, perhaps at the level of fully-  
433 specified object representations.

434 What is the behavioral relevance of highly-specified object representations in which perceptual  
435 and conceptual features are integrated? It has previously been suggested that such representations  
436 allow for discrimination among stimuli with extensive feature overlap, such as exemplars from  
437 the same category (Murray and Bussey, 1999; Noppeny et al., 2007; Graham et al., 2010; Clarke  
438 and Tyler, 2015). In line with this view, individuals with medial ATL lesions that include PRC  
439 typically have more pronounced conceptual impairments related to living than non-living things  
440 (Warrington and Shallice, 1984; Moss et al., 1997, Bozeat et al., 2003), and more striking  
441 perceptual impairments for objects that are visually similar as compared to visually distinct  
442 (Barense et al., 2007, 2010; Lee et al., 2006). In neurologically healthy individuals, fMRI studies  
443 have also demonstrated increased PRC engagement for living as compared to non-living objects  
444 (Moss et al., 2005), for known as compared to novel faces (Barense et al., 2011; Peterson et al.,  
445 2012), and for faces or conceptually meaningless stimuli with high feature overlap as compared  
446 to low (O'Neil et al., 2009; Barense et al., 2012). In a related manner, highly-specified object  
447 representations in PRC have also been linked to long-term memory judgments. For example,  
448 PRC has been linked to explicit recognition memory judgments when previously studied and  
449 novel items are from the same stimulus category (e.g., faces) (Martin et al., 2013, 2016), and

450 when subjects make judgments about their lifetime of experience with a given object concept  
451 (Duke et al., 2016). Common among these task demands and experimental manipulations is the  
452 requirement to discriminate among highly similar stimuli. In such scenarios, a highly-specified  
453 representation that reflects the integration of perceptual and conceptual features necessarily  
454 enables more fine-grained distinctions than a purely perceptual or conceptual representation.

455 This study also has significant implications for prominent neurocognitive models of semantic  
456 memory that have characterized the ATL as a semantic hub (Rogers et al., 2006; Patterson et al.,  
457 2007; Tranel, 2009). On this view, the bilateral ATLs are thought to constitute a trans-modal  
458 convergence zone that abstracts conceptual information from the co-occurrence of features  
459 otherwise represented in a distributed manner across modality-specific cortical nodes. Consistent  
460 with this idea, we have shown that a behavior-based conceptual similarity model predicted the  
461 similarity structure of neural activity patterns in the temporal pole, irrespective of task context.  
462 Specifically, neural activity patterns associated with conceptually similar object concepts that are  
463 visually distinct (e.g., “hairdryer” – “comb”) were more comparable than were conceptually  
464 dissimilar concepts that are visually similar (e.g., “hairdryer” – “gun”), even when task demands  
465 required a critical assessment of visual features. This observation, together with results obtained  
466 in PRC, demonstrates a representational distinction between distinct ATL structures, a  
467 conclusion that dovetails with recent evidence indicating that this region is not functionally  
468 homogeneous (Binney et al., 2010; Murphy et al., 2017). Rather, this outcome suggests that  
469 some ATL sub-regions play a prominent role in task-invariant extraction of conceptual object  
470 properties (e.g., temporal pole), whereas others appear to make differential contributions to the  
471 task-invariant integration of perceptual and conceptual features (e.g., PRC) (Lambon Ralph et  
472 al., 2017; Chen et al., 2017).

473 In summary, we used fMRI to characterize the representational structure of object concepts in  
474 the brain. Specifically, we generated behavior-based models that independently captured the  
475 conceptual and visual similarities among a targeted set of object concepts and used these models  
476 to predict brain-based neural similarities across two task contexts. Using this approach we  
477 revealed three distinct types of coding of object concepts. First, we found that LOC represented  
478 object concepts in a visually-based similarity code. Second, we found that the temporal pole and  
479 parahippocampal cortex represented object concepts in a conceptually-based similarity code, but  
480 that the temporal pole did so in a task invariant manner, whereas parahippocampal cortex only  
481 did so in the context of explicit conceptual feature judgments. Critically, and despite the fact that  
482 our visual and conceptual similarity models were not correlated with one another, we found that  
483 PRC uniquely supported the integrative coding of perceptual and conceptual features in a task  
484 invariant manner. At a broad level, our results suggest that PRC supports the representation of  
485 fully-specified object concepts in which perceptual and conceptual information is integrated.

486

## 487 **Methods**

### 488 **Participants**

#### 489 *Behavior-Based Visual Similarity Rating Task and Conceptual Feature Generation Task*

490 A total of 2846 individuals completed online behavioral tasks using Amazon's Mechanical Turk  
491 (<https://www.mturk.com>). Data from 61 participants were discarded due to technical errors,  
492 incomplete submissions, or missed catch trials. Of the remaining 2785 participants, 1185  
493 completed the visual similarity rating task (616 males, 569 females; age range = 18-53; mean age  
494 = 30.1), and 1600 completed the semantic feature generation task (852 males, 748 females; age  
495 range = 18-58 years; mean age = 31.7). Individuals who completed the visual similarity rating

496 task were excluded from completing the feature generation task, and vice versa. All participants  
497 provided informed consent and were compensated for their time. Both online tasks were  
498 approved by the University of Toronto Ethics Review Board.

#### 499 *Brain-Based fMRI Task*

500 A separate group consisting of sixteen right-handed participants took part in the fMRI  
501 experiment (10 female; age range = 19-29 years; mean age = 23.1 years). This sample size is in  
502 line with extant fMRI studies that have used comparable analytical procedures to test hypotheses  
503 pertaining to object representation in the ventral visual stream and ATL (Bruffaerts et al., 2013;  
504 Devereaux et al., 2013; Martin et al., 2013, 2016; Clarke and Tyler, 2014; Erez et al., 2016). Due  
505 to technical problems, we were unable to obtain data from one experimental run in two different  
506 participants. No participants were removed due to excessive motion using a criterion of 1.5mm  
507 of translational displacement. All participants gave informed consent, reported that they were  
508 native English speakers, free of neurological and psychiatric disorders, and had normal or  
509 corrected to normal vision. Participants were compensated \$50. This study was approved by the  
510 Baycrest Hospital Research Ethics Board.

511

#### 512 **Stimuli**

513 As a starting point, we chained together a list of 80 object concepts in such a way that adjacent  
514 items in the list alternated between being conceptually similar but visually distinct and visually  
515 similar but conceptually distinct (e.g., bullet – gun – hairdryer – comb; bullet and gun are  
516 conceptually but not visually similar, whereas gun and hairdryer are visually but not  
517 conceptually similar, and hairdryer and comb are conceptually but not visually similar, etc.). Our  
518 initial stimulus set was established using the authors' subjective impressions. The visual and

519 conceptual similarities between all pairs of object concepts were then quantified by human  
520 observers in the context of a visual similarity rating task and a conceptual feature generation  
521 task, respectively. Results from these behavioral tasks were then used to select 40 object  
522 concepts used throughout the current study.

523 Participants who completed the visual similarity rating task were presented with 40 pairs of  
524 words and asked to rate visual similarity between the object concepts to which they referred  
525 (Figure 1A). Responses were made using a 5-point scale (very dissimilar, somewhat dissimilar,  
526 neutral, somewhat similar, very similar). Each participant was also presented with four catch  
527 trials on which an object concept was paired with itself. Across participants, 95.7% of catch trials  
528 were rated as being very similar. Data were excluded from 28 participants who did not rate all  
529 four catch trials as being at least ‘somewhat similar’. Every pair of object concepts from the  
530 initial set of 80 object concepts (3160) was rated by 15 different participants.

531 We next quantified conceptual similarities between object concepts based on responses obtained  
532 in a conceptual feature generation task (Figure 1B), following task instructions previously  
533 described by McRae et al. (2005). Each participant was presented with one object concept and  
534 asked to produce a list of up to 15 different types of descriptive features, including functional  
535 properties (e.g., what it is used for, where it is used, and when it is used), physical properties  
536 (e.g., how it looks, sounds, smells, feels, and tastes), and other facts about it, such as the category  
537 to which it belongs or other encyclopedic facts (e.g., where it is from). One example object and  
538 its corresponding features from a normative database were presented as an example (McRae et  
539 al., 2005). Interpretation and organization of written responses were guided by criteria described  
540 by McRae et al. (2005). Features were obtained from 20 different participants for each object  
541 concept. Data were excluded from 33 participants who failed to list any features. A total of 4851



542 unique features were produced across all 80 object concepts and participants. Features listed by  
543 fewer than 4 out of 20 participants were considered to be unreliable and discarded for the  
544 purpose of all subsequent analyses, leaving 723 unique features. This exclusion criterion is  
545 proportionally comparable to that used by McRae et al. (2005). On average, each of the 80 object  
546 concepts was associated with 10.6 features.

547 We used a data-driven approach to select a subset of 40 object concepts from the initial 80-item  
548 set. These 40 object concepts are reflected in the behavior-based visual and conceptual RDMs,  
549 and were used as stimuli in our fMRI experiment. Specifically, we first ensured that each object  
550 concept was visually similar, but conceptually dissimilar, to at least one other item (e.g.,  
551 hairdryer – gun), and conceptually similar, but visually dissimilar, to at least one different item  
552 (e.g., hairdryer – comb). Second, in an effort to ensure that visual and conceptual features varied  
553 independently across object concepts, stimuli were selected such that the corresponding  
554 behavior-based visual and conceptual similarity models were not correlated with one another.  
555

## 556 **Behavior-Based RDMs**

### 557 *Behavior-Based Visual RDM*

558 A behavior-based model that captured visual dissimilarities between all pairs of object concepts  
559 included in the fMRI experiment (40 object concepts) was derived from the visual similarity  
560 judgments obtained from our online rating task. Specifically, similarity ratings for each pair of  
561 object concepts were averaged across participants, normalized, and expressed within a 40x40  
562 RDM (1 – averaged normalized rating). Thus, the value in a given cell of this RDM reflects the  
563 visual similarity of the object concepts at that intersection. This behavior-based visual RDM is  
564 our visual dissimilarity model.

565 *Behavior-Based Conceptual RDM*

566 A behavior-based model that captured conceptual dissimilarities between all pairs of object  
567 concepts included in the fMRI experiment was derived from data obtained in our online feature-  
568 generation task. In order to ensure that the semantic relationships captured by our conceptual  
569 similarity model were not influenced by verbal descriptions of visual attributes, we  
570 systematically removed features that characterized either visual form or color (e.g., “is round” or  
571 “is red”). Using these criteria a total of 58 features (8% of the total number of features provided)  
572 were removed. We next quantified conceptual similarity using a concept-feature matrix in which  
573 rows corresponded to object concepts (i.e., 40 rows) and columns to conceptual features (i.e.,  
574 723 features – 58 visual features = 665 columns) (Figure 1B, center). Specifically, we computed  
575 the cosine angle between each row; cosine similarity reflects the conceptual distances between  
576 object concepts such that high cosine similarities between items denote short conceptual  
577 distance. The conceptual dissimilarities between all pairs of object concepts were expressed as a  
578 40 x 40 RDM. The value within each cell of the conceptual model RDM was calculated as 1 –  
579 the cosine similarity value between the corresponding object concepts. This behavior-based  
580 conceptual RDM is our conceptual dissimilarity model.

581

582 *Behavior-Based RSA: Comparison of Behavior-Based RDMs*

583 We next quantified similarity between our behavior-based visual RDM and behavior-based  
584 conceptual RDM using Kendall’s tau-a as the relatedness measure. This ranked correlation  
585 coefficient is the most appropriate inferential statistic to use when comparing sparse RDMs that  
586 predict many tied ranks (i.e., both models predict complete dissimilarity between many object  
587 pairs; Nili et al., 2014). Inferential analysis of model similarity was performed using a stimulus-

588 label randomization test (10,000 iterations) that simulated the null hypothesis of unrelated RDMs  
589 (i.e., zero correlation) based on the obtained variance. Significance was assessed through  
590 comparison of the obtained Kendall's tau-a coefficient to the equivalent distribution of ranked  
591 null values. As noted in the Results section, this analysis revealed that our behavior-based visual  
592 and conceptual RDMs were not significantly correlated (Kendall's tau-a = .01,  $p = .09$ ).  
593 Moreover, inclusion of the 58 features that described color and visual form in the behavior-based  
594 conceptual RDM did not significantly alter its relationship with the visual behavior-based visual  
595 RDM (Kendall's tau-a = .01,  $p = .09$ ).

596

### 597 **Experimental Procedures: fMRI Feature Verification Task**

598 During scanning, participants completed a feature verification task that required a yes/no  
599 judgment indicating whether a given feature was applicable to a specific object concept on a  
600 trial-by-trial basis. We systematically varied the feature verification probes in a manner that  
601 established a visual feature verification task context and conceptual feature verification task  
602 context. Verification probes comprising the visual task context were selected to encourage  
603 processing of the visual semantic features that characterize each object concept (i.e., shape,  
604 color, and surface detail). To this end, eight specific probes were used: shape [(angular,  
605 rounded), (elongated, symmetrical)], color (light, dark), and surface (smooth, rough). Notably,  
606 all features are associated with two opposing probes (e.g., angular and rounded; natural and  
607 manufactured) to ensure that participants made an equal number of "yes" and "no" responses.  
608 Verification probes comprising the conceptual feature verification task context were selected to  
609 encourage processing of the abstract conceptual features that characterize each object concept  
610 (i.e., animacy, origin, function, and affective associations). To this end, eight specific verification

611 probes were used: (living, non-living), (manufactured, natural), (tool, non-tool), (pleasant,  
612 unpleasant).

### 613 *Procedures*

614 The primary experimental task was evenly divided over eight runs of functional data acquisition.  
615 Each run lasted 7m 56s and was evenly divided into two blocks, each of which corresponded to  
616 either a visual verification task context or a conceptual feature verification task context. The  
617 order of task blocks was counter-balanced across participants. Each block was associated with a  
618 different feature verification probe, with the first and second block in each run separated by 12s  
619 of rest. Blocks began with an 8s presentation of a feature verification probe that was to be  
620 referenced for all intra-block trials. With this design, each object concept was repeated 16 times:  
621 eight repetitions across the visual feature verification task context and eight repetitions across the  
622 conceptual feature verification task context. Behavioral responses were recorded using an MR-  
623 compatible keypad.

624 Stimuli were centrally presented for 2s and each trial was separated by a jittered period of  
625 baseline fixation that ranged 2-6s. Trial order and jitter interval were optimized for each run  
626 using the OptSeq2 algorithm (<http://surfer.nmr.mgh.harvard.edu/optseq/>), with unique sequences  
627 and timing across counterbalanced versions of the experiment. Stimulus presentation and timing  
628 was controlled by E-Prime 2.0 (Psychology Software Tools, Pittsburgh, PA).

629

### 630 **Experimental Procedure: fMRI Functional Localizer Task**

631 Following completion of the main experimental task, each participant completed an independent  
632 functional localizer scan that was subsequently used to identify LOC. Participants viewed  
633 objects, scrambled objects, words, scrambled words, faces, and scenes in separate 24s blocks (12

634 functional volumes). Within each block, 32 images were presented for 400ms each with a 350ms  
635 ISI. There were four groups of six blocks, with each group separated by a 12s fixation period,  
636 and each block corresponding to a different stimulus category. Block order (i.e., stimulus  
637 category) was counterbalanced across groups. All stimuli were presented in the context of a 1-  
638 back task to ensure that participants remained engaged throughout the entire scan. Presentation  
639 of images within blocks was pseudo-random with 1-back repetition occurring 1-2 times per  
640 block.

641

## 642 **ROI Definitions**

643 We performed RSA in four a priori defined ROIs. The temporal pole, PRC, and  
644 parahippocampal cortex were manually defined in both the left and right hemisphere on each  
645 participant's high-resolution anatomical image according to established MR-based protocols  
646 (Pruessner et al., 2002, with adjustment of posterior border of parahippocampal cortex using  
647 anatomical landmarks described by Frankó et al., 2014). Lateral occipital cortex was defined as  
648 the set of contiguous voxels located along the lateral extent of the occipital lobe that responded  
649 more strongly to intact than scrambled objects ( $p < 0.001$ , uncorrected; Malach et al. 1995).

650

## 651 **fMRI Data Acquisition**

652 Scanning was performed using a 3.0-T Siemens MAGNETOM Trio MRI scanner at the Rotman  
653 Research Institute at Baycrest Hospital using a 32-channel receiver head coil. Each scanning  
654 session began with the acquisition of a whole-brain high-resolution magnetization-prepared rapid  
655 gradient-echo T1-weighted structural image (repetition time = 2s, echo time = 2.63ms, flip angle  
656 = 9°, field of view = 25.6cm<sup>2</sup>, 160 oblique axial slices, 192 × 256 matrix, slice thickness =

657 1mm). During each of eight functional scanning runs comprising the main experimental task, a  
658 total of 238 T2\*-weighted echo-planar images were acquired using a two-shot gradient echo  
659 sequence (200 × 200 mm field of view with a 64 × 64 matrix size), resulting in an in-plane  
660 resolution of 3.1 × 3.1 mm for each of 40 2-mm axial slices that were acquired in an interleaved  
661 manner along the axis of the hippocampus. The inter-slice gap was 0.5 mm; repetition time = 2s;  
662 echo time = 30ms; flip angle = 78°). These parameters yielded coverage of the majority of  
663 cortex, excluding only the most superior aspects of the frontal and parietal lobes. During a single  
664 functional localizer scan, a total of 360 T2\*-weighted echo-planar images were acquired using  
665 the same parameters reported for the main experimental task. Lastly, a B0 field map was  
666 collected following completion of the functional localizer scan

667

#### 668 **fMRI Data Analysis Software**

669 Preprocessing and GLM analyses were performed in FSL5 (Smith et al., 2004). Representational  
670 similarity analyses were performed using CoSMoMVPA (<http://www.cosmomvpa.org/>;  
671 Oosterhof et al., 2016) together with custom Matlab code (The MathWorks, Inc., Natick, MA).

672

#### 673 **Preprocessing and Estimation of Object-Specific Multi-Voxel Activity Patterns**

674 Images were initially skull-stripped using a brain extraction tool (BET, Smith, 2002) to remove  
675 non-brain tissue from the image. Data were then corrected for slice-acquisition time, high-pass  
676 temporally filtered (using a 50s period cut-off for event-related runs, and a 128s period cut-off  
677 for the blocked localizer run), and motion corrected (MCFLIRT, Jenkinson et al., 2002).

678 Functional runs were registered to each participant's high-resolution MPRAGE image using

679 FLIRT boundary-based registration with B0-fieldmap correction. The resulting unsmoothed data

680 were analyzed using first-level FEAT (v6.00; [fsl.fmrib.ox.ac.uk/fsl/fslwiki](http://fsl.fmrib.ox.ac.uk/fsl/fslwiki)) in each participant's  
681 native anatomical space. Parameter estimates of BOLD response amplitude were computed using  
682 FILM, with a general linear model that included temporal autocorrelation correction and 6  
683 motion parameters as nuisance covariates. Each trial (i.e., object concept) was modeled with a  
684 delta function corresponding to the stimulus presentation onset and then convolved with a  
685 double-gamma hemodynamic response function. Separate response-amplitude ( $\beta$ ) images were  
686 created for each object concept ( $n = 40$ ), in each run ( $n = 8$ ), in each property verification task  
687 context ( $n = 2$ ). Obtained  $\beta$  images were converted into  $t$ -statistic maps; previous research has  
688 demonstrated a modest advantage for  $t$ -maps over  $\beta$  images in the context of multi-voxel pattern  
689 analysis (Misaki et al., 2010). These data were used for all subsequent similarity analyses.

690

### 691 **Representational Similarity Analysis (RSA)**

692 *ROI-Based RSA: Comparisons of Behavior-Based RDMs with Brain-Based RDMs and Brain-*  
693 *Based RDMs with Brain-Based RDMs*

694 We used linear correlations to quantify the participant-specific dissimilarities ( $1 - \text{Pearson's } r$ )  
695 between all object-evoked multi-voxel activity patterns ( $n = 40$ ) with each ROI ( $n = 4$ ).

696 Dissimilarity measures were expressed in  $40 \times 40$  RDMs for each run ( $n = 8$ ) and verification task  
697 context ( $n = 2$ ), separately. Thus, for each ROI, each participant had eight RDMs that reflected  
698 the (dis)similarity structure from the visual feature verification task context, and eight RDMs that  
699 reflected the (dis)similarity structure from the conceptual verification task context. We then  
700 calculated one mean RDM for each feature verification task context by averaging run-specific  
701 RDMs across participants. Thus, one brain-based RDM was created for the visual task context

702 (i.e., brain-based visual task RDM) and one brain-based RDM was created for the conceptual  
703 task context (i.e., brain-based conceptual task RDM).

704 We next examined how well each of the behavior-based RDMs fit each of the obtained brain-  
705 based RDMs for each ROI. Model fit was quantified as the ranked correlation coefficient  
706 (Kendall's tau-a) between behavior-based RDMs and the brain-based RDMs. Significance  
707 testing was performed using a stimulus-label randomization test (10,000 iterations per model)  
708 Bonferroni corrected for multiple comparisons.

#### 709 *Searchlight-Based RSA*

710 Whole-volume RSA was implemented using 100-voxel surface-based searchlights (Kriegeskorte  
711 et al., 2006; Oosterhof et al., 2011). Each surface-based searchlight referenced the 100 nearest  
712 voxels to the searchlight center based on geodesic distance on the cortical surface. Neural  
713 estimates of dissimilarity (i.e., RDMs) were calculated in each searchlight using the same  
714 approach implemented in our ROI-based RSA. Correlations between behavior-based RDMs  
715 were also quantified using the same approach. The correlation coefficients obtained between  
716 behavior-based RDMs and brain-based RDMs were then Fisher- $z$  transformed and mapped to the  
717 voxel at the centre of each searchlight to create a whole-brain similarity map. Participant-specific  
718 similarity maps were then normalized to a standard MNI template using FNIRT (Greve and  
719 Fischl, 2009). To assess the statistical significance of searchlight maps across participants, all  
720 maps were corrected for multiple comparisons without choosing an arbitrary uncorrected  
721 threshold using threshold-free cluster enhancement (TFCE) with a corrected statistical threshold  
722 of  $p < 0.05$  on the cluster level (Smith and Nichols, 2009). A Monte Carlo simulation permuting  
723 condition labels was used to estimate a null TFCE distribution. First, 100 null searchlight maps  
724 were generated for each participant by randomly permuting condition labels within each obtained



725 searchlight RDM. Next, 10,000 null TFCE maps were constructed by randomly sampling from  
726 these null data sets in order to estimate a null TFCE distribution (Stelzer et al., 2013). The  
727 resulting surface-based statistically thresholded  $z$ -score were projected onto the PALS-B12  
728 surface atlas in CARET version 5.6. (<http://www.nitrc.org/projects/caret/>; Van Essen et al., 2001;  
729 Van Essen, 2005).

## 730 **References**

- 731 Aminoff, E.M., Kveraga, K., & Bar, M. (2013). The role of the parahippocampal cortex in  
732 cognition. *Trends in Cognitive Sciences*, 17(8), 379–390.  
733 <https://doi.org/10.1016/j.tics.2013.06.009>
- 734 Bar, M., & Aminoff, E.M. (2003). Cortical analysis of visual context. *Neuron*, 38(2), 347–358.  
735 [https://doi.org/10.1016/S0896-6273\(03\)00167-3](https://doi.org/10.1016/S0896-6273(03)00167-3)
- 736 Barense, M.D., Bussey, T.J., Lee, A.C.H., Rogers, T.T., Davies, R.R., Saksida, L.M., ...  
737 Graham, K.S. (2005). Functional specialization in the human medial temporal lobe.  
738 *Journal of Neuroscience*, 25(44), 10239–10246.  
739 <https://doi.org/10.1523/JNEUROSCI.2704-05.2005>
- 740 Barense, M.D., Gaffan, D., & Graham, K.S. (2007). The human medial temporal lobe processes  
741 online representations of complex objects. *Neuropsychologia*, 45(13), 2963–2974.  
742 <https://doi.org/10.1016/j.neuropsychologia.2007.05.023>
- 743 Barense, M.D., Groen, I.I.A., Lee, A.C.H., Yeung, L.-K., Brady, S.M., Gregori, M., ... Henson,  
744 R.N.A. (2012). Intact memory for irrelevant information impairs perception in amnesia.  
745 *Neuron*, 75(1), 157–167. <https://doi.org/10.1016/j.neuron.2012.05.014>
- 746 Barense, M.D., Henson, R.N.A., & Graham, K.S. (2011). Perception and conception: temporal  
747 lobe activity during complex discriminations of familiar and novel faces and objects.

- 748 *Journal of Cognitive Neuroscience*, 23(10), 3052–3067.
- 749 [https://doi.org/10.1162/jocn\\_a\\_00010](https://doi.org/10.1162/jocn_a_00010)
- 750 Binder, J.R., & Desai, R.H. (2011). The neurobiology of semantic memory. *Trends in Cognitive*
- 751 *Sciences*, 15(11), 527–536. <https://doi.org/10.1016/j.tics.2011.10.001>
- 752 Binney, R.J., Embleton, K.V., Jefferies, E., Parker, G J.M., Lambon Ralph, M.A. (2010). The
- 753 ventral and inferolateral aspects of the anterior temporal lobe are crucial in semantic
- 754 memory: evidence from a novel direct comparison of distortion-corrected fMRI, rTMS,
- 755 and semantic dementia. *Cerebral Cortex*, 20(11), 2728–2738.
- 756 <https://doi.org/10.1093/cercor/bhq019>
- 757 Bozeat, S., Lambon Ralph, M.A., Graham, K.S., Patterson, K., Wilkin, H., Rowland, J., ...
- 758 Hodges, J.R. (2003). A duck with four legs: investigating the structure of conceptual
- 759 knowledge using picture drawing in semantic dementia. *Cognitive Neuropsychology*,
- 760 20(1), 27–47. <https://doi.org/10.1080/02643290244000176>
- 761 Bruffaerts, R., Dupont, P., Peeters, R., Deyne, S. D., Storms, G., & Vandenberghe, R. (2013).
- 762 Similarity of fMRI activity patterns in left perirhinal cortex reflects semantic similarity
- 763 between words. *Journal of Neuroscience*, 33(47), 18597–18607.
- 764 <https://doi.org/10.1523/JNEUROSCI.1548-13.2013>
- 765 Buckley, M.J., & Gaffan, D. (2006). Perirhinal cortical contributions to object perception. *Trends*
- 766 *in Cognitive Sciences*, 10(3), 100–107. <https://doi.org/10.1016/j.tics.2006.01.008>
- 767 Burwell, R.D., & Amaral, D.G. (1998). Cortical afferents of the perirhinal, postrhinal, and
- 768 entorhinal cortices of the rat. *The Journal of Comparative Neurology*, 398(2), 179–205.
- 769 [https://doi.org/10.1002/\(SICI\)1096-9861\(19980824\)398:2<179::AID-CNE3>3.0.CO;2-Y](https://doi.org/10.1002/(SICI)1096-9861(19980824)398:2<179::AID-CNE3>3.0.CO;2-Y)

- 770 Chadwick, M.J., Anjum, R.S., Kumaran, D., Schacter, D.L., Spiers, H.J., & Hassabis, D. (2016).  
771 Semantic representations in the temporal pole predict false memories. *Proceedings of the*  
772 *National Academy of Sciences*, *113*(36), 10180–10185.  
773 <https://doi.org/10.1073/pnas.1610686113>
- 774 Chen, L., Lambon Ralph, M.A., & Rogers, T.T. (2017). A unified model of human semantic  
775 knowledge and its disorders. *Nature Human Behaviour*, *1*(3).  
776 <https://doi.org/10.1038/s41562-016-0039>
- 777 Clarke, A., & Tyler, L.K. (2014). Object-specific semantic coding in human perirhinal cortex.  
778 *Journal of Neuroscience*, *34*(14), 4766–4775. [https://doi.org/10.1523/JNEUROSCI.2828-](https://doi.org/10.1523/JNEUROSCI.2828-13.2014)  
779 [13.2014](https://doi.org/10.1523/JNEUROSCI.2828-13.2014)
- 780 Clarke, A., & Tyler, L.K. (2015). Understanding what we see: how we derive meaning from  
781 vision. *Trends in Cognitive Sciences*, *19*(11), 677–687.  
782 <https://doi.org/10.1016/j.tics.2015.08.008>
- 783 Damasio, A.R. (1989). The brain binds entities and events by multiregional activation from  
784 convergence zones. *Neural Computation*, *1*(1), 123–132.  
785 <https://doi.org/10.1162/neco.1989.1.1.123>
- 786 Devereux, B.J., Clarke, A., Marouchos, A., & Tyler, L.K. (2013). Representational similarity  
787 analysis reveals commonalities and differences in the semantic processing of words and  
788 objects. *Journal of Neuroscience*, *33*(48), 18906–18916.  
789 <https://doi.org/10.1523/JNEUROSCI.3809-13.2013>
- 790 Devlin, J.T., & Price, C.J. (2007). Perirhinal contributions to human visual perception. *Current*  
791 *Biology*, *17*(17), 1484–1488. <https://doi.org/10.1016/j.cub.2007.07.066>

- 792 Duke, D., Martin, C.B., Bowles, B., McRae, K., & Köhler, S. (2017). Perirhinal cortex tracks  
793 degree of recent as well as cumulative lifetime experience with object concepts. *Cortex*,  
794 89, 61–70. <https://doi.org/10.1016/j.cortex.2017.01.015>
- 795 Erez, J., Cusack, R., Kendall, W., & Barense, M.D. (2016). Conjunctive coding of complex  
796 object features. *Cerebral Cortex*, 26(5), 2271–2282. <https://doi.org/10.1093/cercor/bhv081>
- 797 Frankó, E., Insausti, A.M., Artacho-Pérula, E., Insausti, R., & Chavoix, C. (2014). Identification  
798 of the human medial temporal lobe regions on magnetic resonance images. *Human Brain*  
799 *Mapping*, 35(1), 248–256. <https://doi.org/10.1002/hbm.22170>
- 800 Galton, C.J., Patterson, K., Graham, K., Lambon Ralph, M.A., Williams, G., Antoun, N., ...  
801 Hodges, J.R. (2001). Differing patterns of temporal atrophy in Alzheimer’s disease and  
802 semantic dementia. *Neurology*, 57(2), 216–225. <https://doi.org/10.1212/WNL.57.2.216>
- 803 Graham, K.S., Barense, M.D., & Lee, A.C.H. (2010). Going beyond LTM in the MTL: A  
804 synthesis of neuropsychological and neuroimaging findings on the role of the medial  
805 temporal lobe in memory and perception. *Neuropsychologia*, 48(4), 831–853.  
806 <https://doi.org/10.1016/j.neuropsychologia.2010.01.001>
- 807 Graham, K.S., Hodges, J.R., & Patterson, K. (1994). The relationship between comprehension  
808 and oral reading in progressive fluent aphasia. *Neuropsychologia*, 32(3), 299–316.  
809 [https://doi.org/10.1016/0028-3932\(94\)90133-3](https://doi.org/10.1016/0028-3932(94)90133-3)
- 810 Greve, D.N., & Fischl, B. (2009). Accurate and robust brain image alignment using boundary-  
811 based registration. *NeuroImage*, 48(1), 63–72.  
812 <https://doi.org/10.1016/j.neuroimage.2009.06.060>
- 813 Grill-Spector, K., Kushnir, T., Edelman, S., Avidan, G., Itzhak, Y., & Malach, R. (1999).  
814 Differential processing of objects under various viewing conditions in the human lateral

- 815 occipital complex. *Neuron*, 24(1), 187–203. [https://doi.org/10.1016/S0896-6273\(00\)80832-](https://doi.org/10.1016/S0896-6273(00)80832-)  
816 6
- 817 Hodges, J.R., Patterson, K., Oxbury, S., & Funnell, E. (1992). Semantic dementia: progressive  
818 fluent aphasia with temporal lobe atrophy. *Brain*, 115(6), 1783–1806.  
819 <https://doi.org/10.1093/brain/115.6.1783>
- 820 Jenkinson, M., Bannister, P., Brady, M., & Smith, S. (2002). Improved optimization for the  
821 robust and accurate linear registration and motion correction of brain images. *NeuroImage*,  
822 17(2), 825–841. <https://doi.org/10.1006/nimg.2002.1132>
- 823 Kahn, I., Andrews-Hanna, J.R., Vincent, J.L., Snyder, A.Z., & Buckner, R.L. (2008). Distinct  
824 cortical anatomy linked to subregions of the medial temporal lobe revealed by intrinsic  
825 functional connectivity. *Journal of Neurophysiology*, 100(1), 129–139.  
826 <https://doi.org/10.1152/jn.00077.2008>
- 827 Kiefer, M., & Pulvermüller, F. (2012). Conceptual representations in mind and brain: Theoretical  
828 developments, current evidence and future directions. *Cortex*, 48(7), 805–825.  
829 <https://doi.org/10.1016/j.cortex.2011.04.006>
- 830 Kourtzi, Z., & Kanwisher, N. (2001). Representation of perceived object shape by the human  
831 lateral occipital complex. *Science*, 293(5534), 1506–1509.  
832 <https://doi.org/10.1126/science.1061133>
- 833 Kriegeskorte, N., Goebel, R., & Bandettini, P. (2006). Information-based functional brain  
834 mapping. *Proceedings of the National Academy of Sciences of the United States of*  
835 *America*, 103(10), 3863–3868. <https://doi.org/10.1073/pnas.0600244103>

- 836 Kriegeskorte, N., & Kievit, R.A. (2013). Representational geometry: integrating cognition,  
837 computation, and the brain. *Trends in Cognitive Sciences*, 17(8), 401–412.  
838 <https://doi.org/10.1016/j.tics.2013.06.007>
- 839 Lambon Ralph, M.A., Pobric, G., & Jefferies, E. (2009). Conceptual knowledge is underpinned  
840 by the temporal pole bilaterally: convergent evidence from rTMS. *Cerebral Cortex*, 19(4),  
841 832–838. <https://doi.org/10.1093/cercor/bhn131>
- 842 Lambon Ralph, M.A., Jefferies, E., Patterson, K., & Rogers, T.T. (2017). The neural and  
843 computational bases of semantic cognition. *Nature Reviews. Neuroscience*, 18(1), 42–55.  
844 <https://doi.org/10.1038/nrn.2016.150>
- 845 Lee, A.C.H., Buckley, M.J., Pegman, S.J., Spiers, H., Scahill, V.L., Gaffan, D., ... Graham, K.S.  
846 (2005). Specialization in the medial temporal lobe for processing of objects and scenes.  
847 *Hippocampus*, 15(6), 782–797. <https://doi.org/10.1002/hipo.20101>
- 848 Lee, A.C.H., Buckley, M.J., Gaffan, D., Emery, T., Hodges, J.R., & Graham, K.S. (2006).  
849 Differentiating the roles of the hippocampus and perirhinal cortex in processes beyond  
850 long-term declarative memory: a double dissociation in dementia. *Journal of*  
851 *Neuroscience*, 26(19), 5198–5203. <https://doi.org/10.1523/JNEUROSCI.3157-05.2006>
- 852 Lehky, S.R., & Tanaka, K. (2016). Neural representation for object recognition in inferotemporal  
853 cortex. *Current Opinion in Neurobiology*, 37, 23–35.  
854 <https://doi.org/10.1016/j.conb.2015.12.001>
- 855 Malach, R., Reppas, J.B., Benson, R.R., Kwong, K.K., Jiang, H., Kennedy, W.A., ... Tootell, R.  
856 B. (1995). Object-related activity revealed by functional magnetic resonance imaging in  
857 human occipital cortex. *Proceedings of the National Academy of Sciences*, 92(18), 8135–  
858 8139.

- 859 Martin, A., Haxby, J.V., Lalonde, F.M., Wiggs, C.L., & Ungerleider, L.G. (1995). Discrete  
860 cortical regions associated with knowledge of color and knowledge of action. *Science*,  
861 270(5233), 102.
- 862 Martin, A. (2016). GRAPES—Grounding representations in action, perception, and emotion  
863 systems: How object properties and categories are represented in the human brain.  
864 *Psychonomic Bulletin & Review*, 23(4), 979–990. [https://doi.org/10.3758/s13423-015-](https://doi.org/10.3758/s13423-015-0842-3)  
865 0842-3
- 866 Martin, C.B., McLean, D.A., O’Neil, E.B., & Köhler, S. (2013). Distinct familiarity-based  
867 response patterns for faces and buildings in perirhinal and parahippocampal cortex.  
868 *Journal of Neuroscience*, 33(26), 10915–10923.  
869 <https://doi.org/10.1523/JNEUROSCI.0126-13.2013>
- 870 Martin, C.B., Cowell, R.A., Gribble, P.L., Wright, J., & Köhler, S. (2016). Distributed category-  
871 specific recognition-memory signals in human perirhinal cortex. *Hippocampus*, 26(4),  
872 423–436. <https://doi.org/10.1002/hipo.22531>
- 873 McLelland, V.C., Chan, D., Ferber, S., & Barense, M.D. (2014). Stimulus familiarity modulates  
874 functional connectivity of the perirhinal cortex and anterior hippocampus during visual  
875 discrimination of faces and objects. *Frontiers in Human Neuroscience*, 8.  
876 <https://doi.org/10.3389/fnhum.2014.00117>
- 877 McRae, K., Cree, G.S., Seidenberg, M.S., & McNorgan, C. (2005). Semantic feature production  
878 norms for a large set of living and nonliving things. *Behavior Research Methods*, 37(4),  
879 547–559. <https://doi.org/10.3758/BF03192726>
- 880 Milner, D., & Goodale, M. (2006). *The visual brain in action*. OUP Oxford.

- 881 Misaki, M., Kim, Y., Bandettini, P.A., & Kriegeskorte, N. (2010). Comparison of multivariate  
882 classifiers and response normalizations for pattern-information fMRI. *NeuroImage*, *53*(1),  
883 103–118. <https://doi.org/10.1016/j.neuroimage.2010.05.051>
- 884 Moss, H.E., Tyler, L.K., & Jennings, F. (1997). When leopards lose their spots: knowledge of  
885 visual properties in category-specific deficits for living things. *Cognitive Neuropsychology*,  
886 *14*(6), 901–950. <https://doi.org/10.1080/026432997381394>
- 887 Moss, H.E., Rodd, J.M., Stamatakis, E.A., Bright, P., & Tyler, L.K. (2005). Anteromedial  
888 temporal cortex supports fine-grained differentiation among objects. *Cerebral Cortex*,  
889 *15*(5), 616–627. <https://doi.org/10.1093/cercor/bhh163>
- 890 Mummery, C.J., Patterson, K., Price, C.J., Ashburner, J., Frackowiak, R.S., & Hodges, J.R.  
891 (2000). A voxel-based morphometry study of semantic dementia: relationship between  
892 temporal lobe atrophy and semantic memory. *Annals of Neurology*, *47*(1), 36–45.
- 893 Mur, M. (2014). What’s the difference between a tiger and a cat? From visual object to semantic  
894 concept via the perirhinal cortex. *Journal of Neuroscience*, *34*(32), 10462–10464.  
895 <https://doi.org/10.1523/JNEUROSCI.2248-14.2014>
- 896 Murphy, C., Rueschemeyer, S.-A., Watson, D., Karapanagiotidis, T., Smallwood, J., & Jefferies,  
897 E. (2017). Fractionating the anterior temporal lobe: MVPA reveals differential responses to  
898 input and conceptual modality. *NeuroImage*, *147*, 19–31.  
899 <https://doi.org/10.1016/j.neuroimage.2016.11.067>
- 900 Murray, E.A., & Bussey, T.J. (1999). Perceptual–mnemonic functions of the perirhinal cortex.  
901 *Trends in Cognitive Sciences*, *3*(4), 142–151. <https://doi.org/10.1016/S1364->  
902 [6613\(99\)01303-0](https://doi.org/10.1016/S1364-6613(99)01303-0)



- 903 Murray, E.A., Bussey, T.J., & Saksida, L.M. (2007). Visual perception and memory: a new view  
904 of medial temporal lobe function in primates and rodents. *Annual Review of Neuroscience*,  
905 30(1), 99–122. <https://doi.org/10.1146/annurev.neuro.29.051605.113046>
- 906 Nili, H., Wingfield, C., Walther, A., Su, L., Marslen-Wilson, W., & Kriegeskorte, N. (2014). A  
907 toolbox for representational similarity analysis. *PLOS Computational Biology*, 10(4),  
908 e1003553. <https://doi.org/10.1371/journal.pcbi.1003553>
- 909 Noppeney, U., Patterson, K., Tyler, L.K., Moss, H., Stamatakis, E.A., Bright, P., ... Price, C.J.  
910 (2007). Temporal lobe lesions and semantic impairment: a comparison of herpes simplex  
911 virus encephalitis and semantic dementia. *Brain*, 130(4), 1138–1147.  
912 <https://doi.org/10.1093/brain/awl344>
- 913 O’Neil, E.B., Cate, A.D., & Köhler, S. (2009). Perirhinal cortex contributes to accuracy in  
914 recognition memory and perceptual discriminations. *Journal of Neuroscience*, 29(26),  
915 8329–8334. <https://doi.org/10.1523/JNEUROSCI.0374-09.2009>
- 916 Oosterhof, N.N., Wiestler, T., Downing, P.E., & Diedrichsen, J. (2011). A comparison of  
917 volume-based and surface-based multi-voxel pattern analysis. *NeuroImage*, 56(2), 593–  
918 600. <https://doi.org/10.1016/j.neuroimage.2010.04.270>
- 919 Oosterhof, N.N., Connolly, A.C., & Haxby, J.V. (2016). CoSMoMVPA: multi-modal  
920 multivariate pattern analysis of neuroimaging data in Matlab/GNU Octave. *Frontiers in*  
921 *Neuroinformatics*, 10. <https://doi.org/10.3389/fninf.2016.00027>
- 922 Patterson, K., Nestor, P.J., & Rogers, T.T. (2007). Where do you know what you know? The  
923 representation of semantic knowledge in the human brain. *Nature Reviews Neuroscience*,  
924 8(12), 976–987. <https://doi.org/10.1038/nrn2277>

- 925 Peelen, M.V., & Caramazza, A. (2012). Conceptual object representations in human anterior  
926 temporal cortex. *Journal of Neuroscience*, *32*(45), 15728–15736.  
927 <https://doi.org/10.1523/JNEUROSCI.1953-12.2012>
- 928 Peterson, M.A., Cacciamani, L., Barense, M.D., & Scaif, P.E. (2012). The perirhinal cortex  
929 modulates V2 activity in response to the agreement between part familiarity and  
930 configuration familiarity. *Hippocampus*, *22*(10), 1965–1977.  
931 <https://doi.org/10.1002/hipo.22065>
- 932 Pobric, G., Jefferies, E., & Lambon Ralph, M.A. (2007). Anterior temporal lobes mediate  
933 semantic representation: mimicking semantic dementia by using rTMS in normal  
934 participants. *Proceedings of the National Academy of Sciences*, *104*(50), 20137–20141.  
935 <https://doi.org/10.1073/pnas.0707383104>
- 936 Pruessner, J.C., Köhler, S., Crane, J., Pruessner, M., Lord, C., Byrne, A., ... Evans, A.C. (2002).  
937 Volumetry of temporopolar, perirhinal, entorhinal and parahippocampal cortex from high-  
938 resolution MR images: considering the variability of the collateral sulcus. *Cerebral Cortex*,  
939 *12*(12), 1342–1353. <https://doi.org/10.1093/cercor/12.12.1342>
- 940 Ranganath, C., & Ritchey, M. (2012). Two cortical systems for memory-guided behaviour.  
941 *Nature Reviews Neuroscience*, *13*(10), 713–726. <https://doi.org/10.1038/nrn3338>
- 942 Rogers, T.T., Lambon Ralph, M.A., Garrard, P., Bozeat, S., McClelland, J.L., Hodges, J.R., &  
943 Patterson, K. (2004). Structure and deterioration of semantic memory: a  
944 neuropsychological and computational investigation. *Psychological Review*, *111*(1), 205–  
945 235. <https://doi.org/10.1037/0033-295X.111.1.205>
- 946 Rogers, T.T., & McClelland, J. L. (2004). *Semantic Cognition: A Parallel Distributed*  
947 *Processing Approach*. MIT Press.

- 948 Rogers, T.T., Hocking, J., Noppeney, U., Mechelli, A., Gorno-Tempini, M.L., Patterson, K., &  
949 Price, C.J. (2006). Anterior temporal cortex and semantic memory: Reconciling findings  
950 from neuropsychology and functional imaging. *Cognitive, Affective, & Behavioral*  
951 *Neuroscience*, 6(3), 201–213. <https://doi.org/10.3758/CABN.6.3.201>
- 952 Rosch, E., & Mervis, C.B. (1975). Family resemblances: Studies in the internal structure of  
953 categories. *Cognitive Psychology*, 7(4), 573–605. [https://doi.org/10.1016/0010-](https://doi.org/10.1016/0010-0285(75)90024-9)  
954 [0285\(75\)90024-9](https://doi.org/10.1016/0010-0285(75)90024-9)
- 955 Smith, S.M. (2002). Fast robust automated brain extraction. *Human Brain Mapping*, 17(3), 143–  
956 155. <https://doi.org/10.1002/hbm.10062>
- 957 Smith, S.M., & Nichols, T.E. (2009). Threshold-free cluster enhancement: Addressing problems  
958 of smoothing, threshold dependence and localisation in cluster inference. *NeuroImage*,  
959 44(1), 83–98. <https://doi.org/10.1016/j.neuroimage.2008.03.061>
- 960 Stelzer, J., Chen, Y., & Turner, R. (2013). Statistical inference and multiple testing correction in  
961 classification-based multi-voxel pattern analysis (MVPA): Random permutations and  
962 cluster size control. *NeuroImage*, 65, 69–82.  
963 <https://doi.org/10.1016/j.neuroimage.2012.09.063>
- 964 Suzuki, W.L., & Amaral, D.G. (1994). Perirhinal and parahippocampal cortices of the macaque  
965 monkey: Cortical afferents. *The Journal of Comparative Neurology*, 350(4), 497–533.  
966 <https://doi.org/10.1002/cne.903500402>
- 967 Suzuki, W.A., & Naya, Y. (2014). The perirhinal cortex. *Annual Review of Neuroscience*, 37,  
968 39–53. <https://doi.org/10.1146/annurev-neuro-071013-014207>

- 969 Taylor, K.I., Devereux, B.J., Acres, K., Randall, B., & Tyler, L.K. (2012). Contrasting effects of  
970 feature-based statistics on the categorisation and basic-level identification of visual objects.  
971 *Cognition*, 122(3), 363–374. <https://doi.org/10.1016/j.cognition.2011.11.001>
- 972 Thompson-Schill, S.L. (2003). Neuroimaging studies of semantic memory: inferring “how” from  
973 “where.” *Neuropsychologia*, 41(3), 280–292. [https://doi.org/10.1016/S0028-](https://doi.org/10.1016/S0028-3932(02)00161-6)  
974 [3932\(02\)00161-6](https://doi.org/10.1016/S0028-3932(02)00161-6)
- 975 Tranel, D. (2009). The left temporal pole is important for retrieving words for unique concrete  
976 entities. *Aphasiology*, 23(7), 867. <https://doi.org/10.1080/02687030802586498>
- 977 Tyler, L.K., & Moss, H.E. (2001). Towards a distributed account of conceptual knowledge.  
978 *Trends in Cognitive Sciences*, 5(6), 244–252. [https://doi.org/10.1016/S1364-](https://doi.org/10.1016/S1364-6613(00)01651-X)  
979 [6613\(00\)01651-X](https://doi.org/10.1016/S1364-6613(00)01651-X)
- 980 Van Essen, D.C. (2005). A population-average, landmark- and surface-based (PALS) atlas of  
981 human cerebral cortex. *NeuroImage*, 28(3), 635–662.  
982 <https://doi.org/10.1016/j.neuroimage.2005.06.058>
- 983 Van Essen, D.C., Drury, H. A., Dickson, J., Harwell, J., Hanlon, D., & Anderson, C.H. (2001).  
984 An integrated software suite for surface-based analyses of cerebral cortex. *Journal of the*  
985 *American Medical Informatics Association*, 8(5), 443–459.  
986 <https://doi.org/10.1136/jamia.2001.0080443>
- 987 Wang, S.-F., Ritchey, M., Libby, L.A., & Ranganath, C. (2016). Functional connectivity based  
988 parcellation of the human medial temporal lobe. *Neurobiology of Learning and Memory*,  
989 *134, Part A*, 123–134. <https://doi.org/10.1016/j.nlm.2016.01.005>
- 990 Warrington, E.K. (1975). The selective impairment of semantic memory. *Quarterly Journal of*  
991 *Experimental Psychology*, 27(4), 635–657. <https://doi.org/10.1080/14640747508400525>

992 Warrington, E.K., & Shallice, T. (1984). Category specific semantic impairments. *Brain*, *107*(3),  
993 829–853. <https://doi.org/10.1093/brain/107.3.829>

994 Wright, P., Randall, B., Clarke, A., & Tyler, L.K. (2015). The perirhinal cortex and conceptual  
995 processing: effects of feature-based statistics following damage to the anterior temporal  
996 lobes. *Neuropsychologia*, *76*, 192–207.

997 <https://doi.org/10.1016/j.neuropsychologia.2015.01.041>

998 Zhuo, J., Fan, L., Liu, Y., Zhang, Y., Yu, C., & Jiang, T. (2016). Connectivity profiles reveal a  
999 transition subarea in the parahippocampal region that integrates the anterior temporal–  
1000 posterior medial systems. *Journal of Neuroscience*, *36*(9), 2782–2795.

1001 <https://doi.org/10.1523/JNEUROSCI.1975-15.2016>

1002

### 1003 **Acknowledgements**

1004 This work was supported by the Canadian Natural Sciences Engineering Research Council  
1005 (Discovery and Accelerator Grants to M.D.B.; Postdoctoral Fellowship award to C.B.M.), the  
1006 James S. McDonnell Foundation (Scholar Award to M.D.B.), and the Canada Research Chairs  
1007 Program (M.D.B.).

### 1008 **Competing Interests**

1009 The authors declare no competing interests.

1010 **Table 1.** Clusters in which behavior-based RDMs were significantly correlated with brain-based  
 1011 RDMs as revealed using representational similarity searchlight analyses, with corresponding  
 1012 cluster extent, peak  $z$ -values, and MNI co-ordinates<sup>1</sup>.

| Region                                                                 | Cluster Extent | Peak $z$ -value | x   | y   | z   |
|------------------------------------------------------------------------|----------------|-----------------|-----|-----|-----|
| <b>Visual Task Context</b>                                             |                |                 |     |     |     |
| <i>Behavior-Based Visual RDM – Brain-Based Visual Task RDM</i>         |                |                 |     |     |     |
| Mid calcarine                                                          | 1660           | 5.79            | -2  | -74 | 12  |
| R lateral occipital cortex                                             | 455            | 3.89            | 50  | -66 | 4   |
| R perirhinal cortex                                                    | 112            | 3.64            | 34  | -12 | -34 |
| L superior parietal lobule                                             | 110            | 3.21            | -32 | -40 | 44  |
| L perirhinal cortex                                                    | 76             | 2.85            | -30 | -12 | -36 |
| R superior parietal lobule                                             | 48             | 2.64            | 38  | -54 | 54  |
| R fusiform gyrus                                                       | 45             | 2.77            | 40  | -46 | -20 |
| R precuneus                                                            | 29             | 2.66            | 12  | -76 | 48  |
| R Inferior Temporal Gyrus                                              | 9              | 2.52            | 44  | -22 | -28 |
| <i>Behavior-Based Conceptual RDM – Brain-Based Visual Task RDM</i>     |                |                 |     |     |     |
| L Perirhinal Cortex                                                    | 368            | 3.96            | -24 | 2   | -38 |
| R Perirhinal Cortex                                                    | 232            | 3.26            | 22  | 2   | -36 |
| <i>Overlap</i>                                                         |                |                 |     |     |     |
| L Perirhinal Cortex                                                    | 22             |                 | -30 | -8  | -38 |
| <b>Conceptual Task Context</b>                                         |                |                 |     |     |     |
| <i>Behavior-Based Conceptual RDM – Brain-Based Conceptual Task RDM</i> |                |                 |     |     |     |
| L Perirhinal Cortex                                                    | 79             | 2.88            | -30 | -10 | -34 |
| R Parahippocampal Cortex                                               | 64             | 2.94            | 30  | -24 | -24 |
| L Temporal Pole                                                        | 61             | 2.89            | -34 | 4   | -26 |
| R Temporal Pole                                                        | 25             | 2.70            | 24  | 12  | -36 |
| <i>Behavior-Based Visual RDM – Brain-Based Conceptual Task RDM</i>     |                |                 |     |     |     |
| L Perirhinal Cortex                                                    | 98             | 4.87            | -26 | -4  | -10 |
| R Perirhinal Cortex                                                    | 26             | 3.01            | 28  | -12 | -34 |
| <i>Overlap</i>                                                         |                |                 |     |     |     |
| L Perirhinal Cortex                                                    | 31             |                 | -26 | -8  | -42 |
| <b>Overlap across all Behavior-Based RDMs and Brain-Based RDMs</b>     |                |                 |     |     |     |
| L Perirhinal Cortex                                                    | 16             |                 | -30 | -8  | -36 |

1013  
 1014 <sup>1</sup>MNI co-ordinates are reported for the peak voxel in individual clusters and the centre of mass  
 1015 for cluster overlap.  
 1016

1017 **Figure Captions**

1018 **Figure 1. Behavior-based representational dissimilarity matrices (RDMs).** (A) Visual  
1019 similarity rating task (left) and corresponding 40x40 behavior-based visual RDM (right). (B)  
1020 Conceptual feature generation task with sample responses from two participants (left), abridged  
1021 feature matrix depicting the number of participants that listed each feature for each concept  
1022 (centre), and corresponding 40x40 behavior-based conceptual RDM (right).

1023 **Figure 2. Brain-based representational dissimilarity matrices (RDMs).** (A) Example of  
1024 object-evoked neural activity patterns obtained across all eight probes in the visual task context  
1025 (left), mean object-specific activity patterns averaged across repetitions (center), and  
1026 corresponding 40x40 brain-based visual task RDM (right). (B) Example of object-evoked neural  
1027 activity patterns obtained across all eight probes in the conceptual task context (left), mean  
1028 object-specific activity patterns averaged across repetitions (center), and corresponding 40x40  
1029 brain-based conceptual task RDM (right).

1030 **Figure 3. fMRI feature verification task performance.** Percentage of trials on which all  
1031 participants (i.e., 16/16) provided the same ‘yes/no’ response for each property verification  
1032 probe.

1033 **Figure 4. Regions of interest (ROIs) in a representative participant.** Cortical regions  
1034 examined in the ROI-based RSA, including lateral occipital cortex (orange), parahippocampal  
1035 cortex (yellow), perirhinal cortex (pink), and the temporal pole (green).

1036 **Figure 5. Correlation-based representational similarity analyses (RSA).** The dashed  
1037 horizontal arrow between behavior-based RDMs reflects second-level RSA in which the visual  
1038 and conceptual models were compared. Solid vertical and diagonal arrows reflect second-level

1039 RSA in which behavior-based RDMs were compared with brain-based RDMs. The dashed  
1040 horizontal arrow between brain-based RDMs reflects second-level RSA in which neural pattern  
1041 similarities from each task context were directly compared with each other.

1042 **Figure 6. ROI-based RSA results.** Similarities between behavior-based and brain-based  
1043 representational dissimilarity matrices (RDMs) are plotted for each ROI. Similarity was  
1044 quantified as the ranked correlation coefficient (Kendall's tau-a) between behavior-based RDMs  
1045 and the brain-based RDMs. Error bars indicate the standard error, estimated as the standard  
1046 deviation of 100 deviation estimates obtained from the stimulus-label randomization test. \*\*\*  $p <$   
1047  $.0001$ , \*\*  $p < .001$ .

1048 **Figure 7. Representational similarity searchlight mapping results.** (A) Cortical regions in  
1049 which the brain-based visual task representational dissimilarity matrix (RDM) was significantly  
1050 correlated with the behavior-based visual RDM (left) and the behavior-based conceptual RDM  
1051 (right). (B) Overlap between brain-behavior similarity maps in the visual task context. (C)  
1052 Cortical regions in which the brain-based conceptual task RDM was significantly correlated with  
1053 the behavior-based visual RDM (left) and the behavior-based conceptual RDM (right). (D)  
1054 Overlap between brain-behavior similarity maps in conceptual task context. (E) Overlap among  
1055 brain-behavior similarity maps across both task contexts. The correlation coefficients (Kendall's  
1056 tau-a) obtained between behavior-based RDMs and brain-based RDMs were Fisher-z  
1057 transformed and mapped to the voxel at the centre of each searchlight to create the whole-brain  
1058 similarity maps in panels A and C. Similarity maps in panels A and C were corrected for  
1059 multiple comparisons using threshold-free cluster enhancement (TFCE) with a corrected  
1060 statistical threshold of  $p < 0.05$  on the cluster level (Smith and Nichols, 2009).



**A****Behavior: Visual Similarity Rating Task**

1185 participants rated the visual similarity between 20 pairs of object concepts. Each pair received 15 ratings.

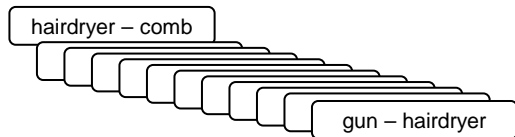

Mean pairwise ratings were normalized and expressed in an RDM

**Behavior-Based Visual RDM**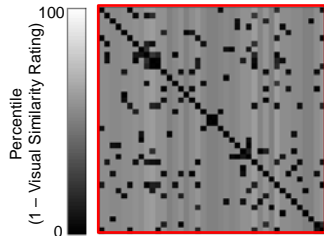**B****Behavior: Conceptual Feature Generation Task**

1600 participants listed conceptual features for one object concept each. 20 lists obtained for each object.

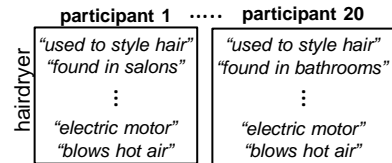

|           | feature frequency         |                        |     |                     |
|-----------|---------------------------|------------------------|-----|---------------------|
|           | <i>used to style hair</i> | <i>found in salons</i> | ... | <i>used to kill</i> |
| hairdryer | 20                        | 17                     |     | 0                   |
| comb      | 16                        | 12                     |     | 0                   |
| ⋮         | ⋮                         | ⋮                      |     | ⋮                   |
| gun       | 0                         | 0                      |     | 20                  |

1 - cosine angle between feature vectors

**Behavior-Based Conceptual RDM**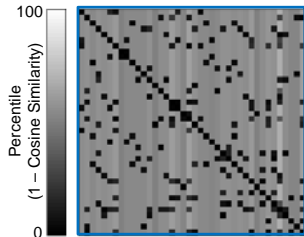

**A****fMRI: Visual Task Context**

8 activity patterns obtained for each object concept using different visual feature verification probes in each run.

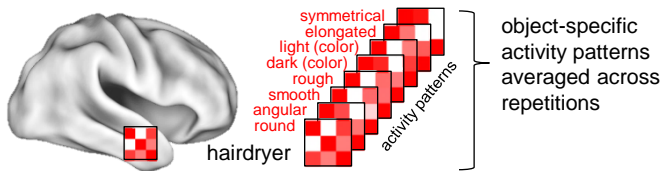**Brain-Based Visual Task RDM**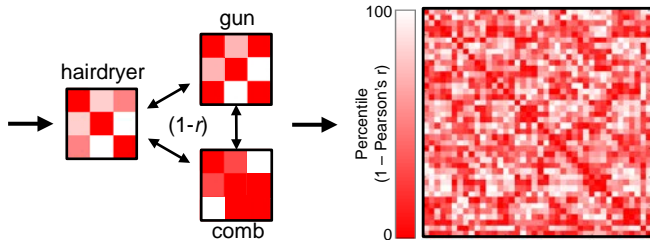**B****fMRI: Conceptual Task Context**

8 activity patterns obtained for each object concept using different visual feature verification probes in each run.

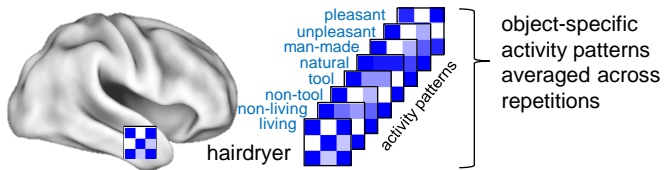**Brain-Based Conceptual Task RDM**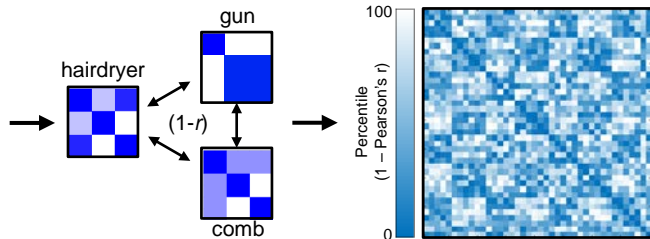

# fMRI Verification Task Response Consistency

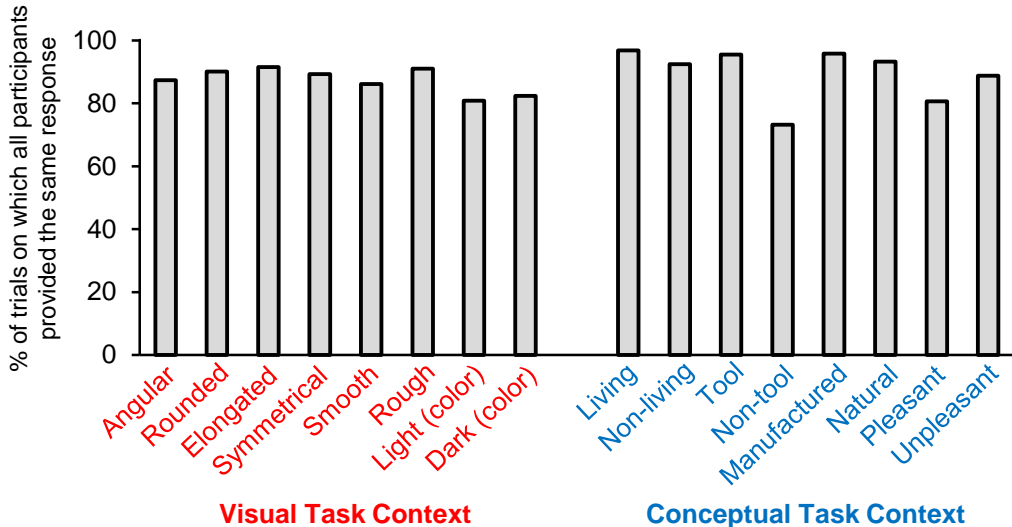

### Lateral Occipital Cortex

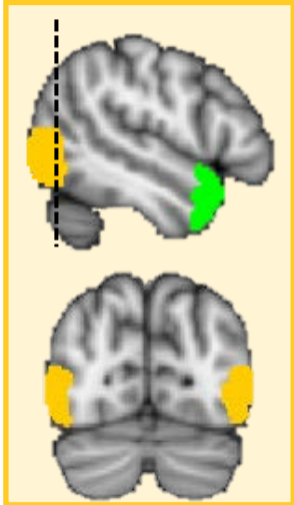

### Parahippocampal Cortex

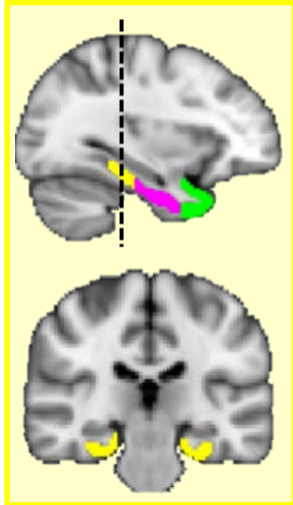

### Perirhinal Cortex

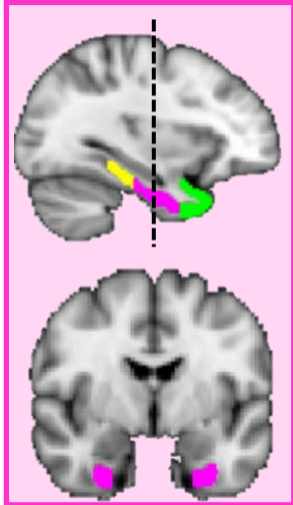

### Temporal Pole

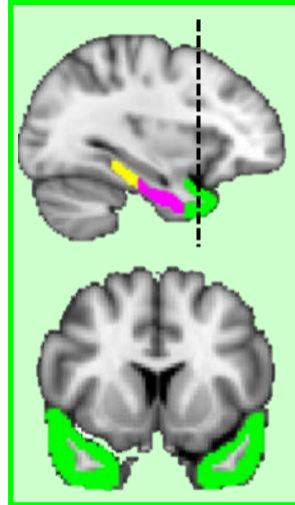

Posterior Ventral Visual Stream  Anterior Ventral Visual Stream

### Behavior-Based Visual RDM

Reflects visual dissimilarity  
between object concepts in  
psychological space.

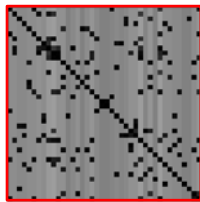

### Behavior-Based Conceptual RDM

Reflects conceptual dissimilarity  
between object concepts in  
psychological space.

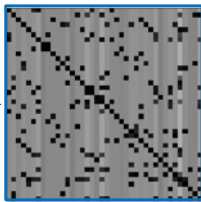

### Brain-Based Visual Task RDM

Reflects dissimilarity between  
object-specific neural activity  
patterns in the visual feature  
verification task context.

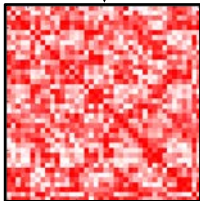

### Brain-Based Conceptual Task RDM

Reflects dissimilarity between  
object-specific neural activity  
patterns in the conceptual feature  
verification task context.

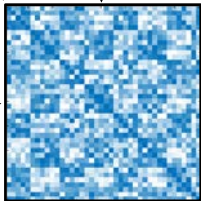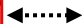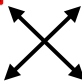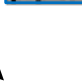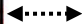

## Lateral Occipital Cortex

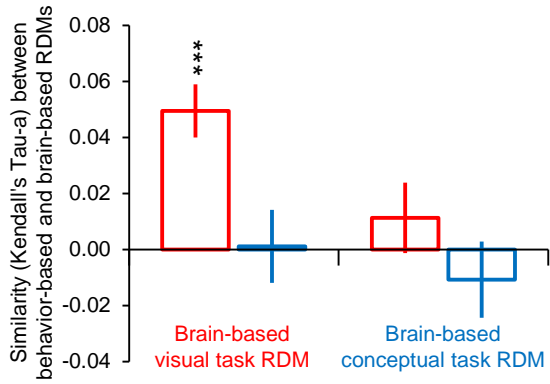

## Parahippocampal Cortex

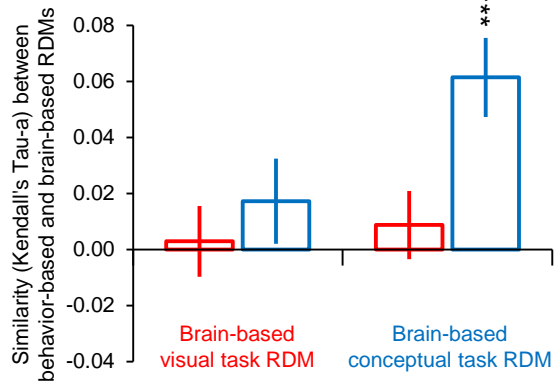

## Perirhinal Cortex

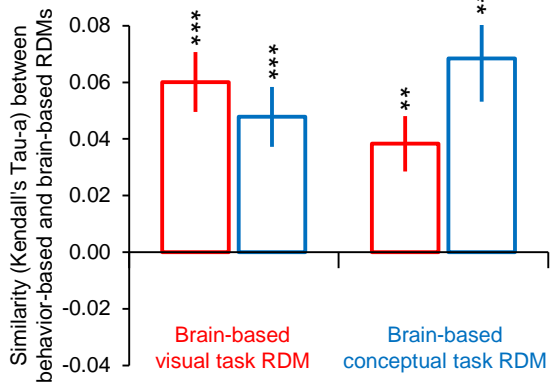

## Temporal Pole

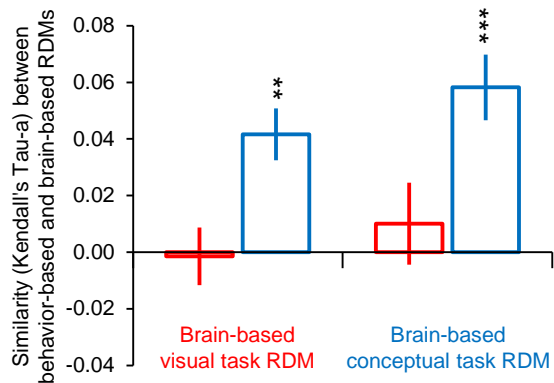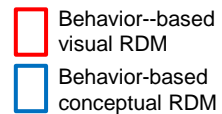

**A****Similarity Maps in Visual Task Context**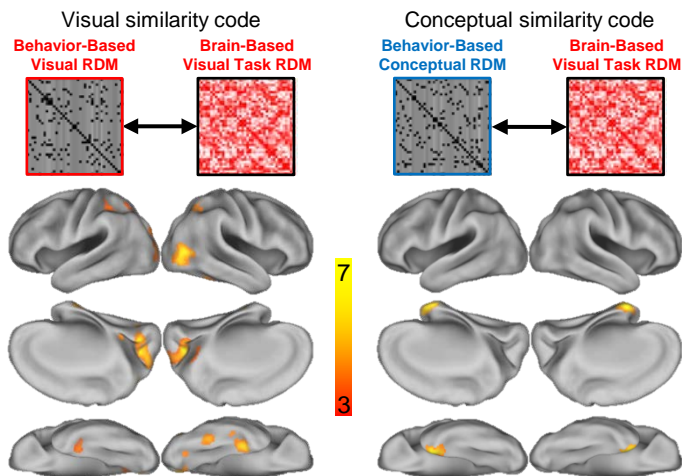**B****Overlap of Similarity Maps in Visual Task Context**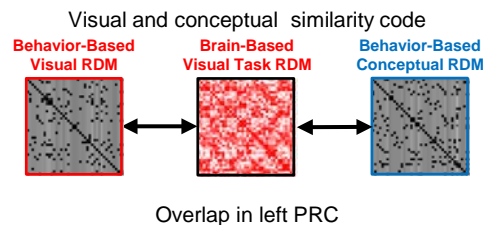**C****Similarity Maps in Conceptual Task Context**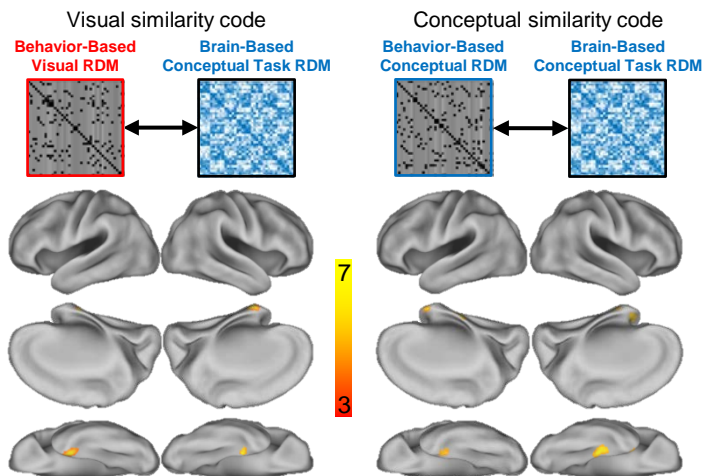**D****Overlap of Similarity Maps in Conceptual Task Context**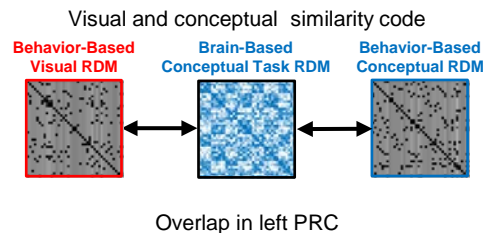**E****Overlap of Similarity Maps in Visual and Conceptual Task Contexts**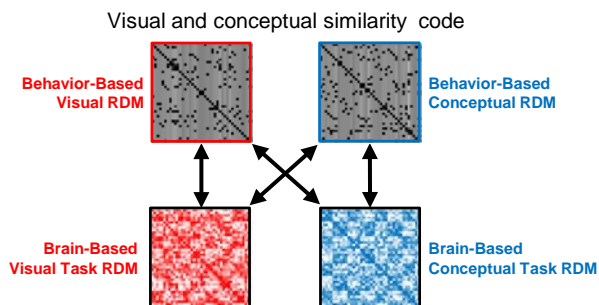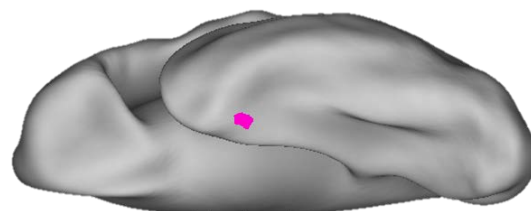

Source: https://www.biorxiv.org/content/10.1101/186924v1.full.pdf
